# Supplementary material for: Mycotoxin profiling of 1000 beer samples with a special focus on craft beer
Source: PubMed Central journal article supplement (PMC5628871; doi:10.1371/journal.pone.0185887), 2017-10-05
Supplement: pone.0185887.s001.pdf [file pone.0185887.s001.pdf]

## LC-MS/MS conditions positive and negative mode

### LC conditions

Injection volume: 5  $\mu$ L

Column: Restek Ultra Aqueous C18, 100 x 2.1 mm ID, 3  $\mu$ m particle size

Temperature: 35°C

Flow rate: 0.40 mL/min

Positive mode:

Eluent A: water containing 1% formic acid + 1 mM ammonium formate

Eluent B: methanol/water = 95/5 (V/V) containing 1% formic acid + 1 mM ammonium formate

Negative mode:

Eluent A: water containing 0.1% acetic acid + 5 mM ammonium acetate

Eluent B: methanol/water = 95/5 (V/V) containing 0.1% acetic acid + 5 mM ammonium acetate

Gradient:

| Time (min) | %A  | %B  |
|------------|-----|-----|
| 0          | 100 | 0   |
| 1          | 100 | 0   |
| 2          | 50  | 50  |
| 3          | 50  | 50  |
| 8          | 0   | 100 |
| 10         | 0   | 100 |
| 10.5       | 100 | 0   |
| 15         | 100 | 0   |

### **MS conditions positive mode**

MS system: 5500 QTrap (AB Sciex)

Generic settings:

---

|                  |          |
|------------------|----------|
| Scan mode        | ESI+     |
| Scan type        | MRM      |
| Scheduled MRM    | Yes      |
| Polarity         | positive |
| Target scan time | 0.3 sec  |
| Resolution Q1    | unit     |
| Resolution Q3    | unit     |
| MR pause         | 5 msec   |

---

|                        |        |
|------------------------|--------|
| Curtain gas (CUR)      | 40 psi |
| Collision gas (CAD)    | medium |
| Temperature (TEM)      | 400 °C |
| Ion Source Gas 1 (GS1) | 50 psi |
| Ion Source Gas 2 (GS2) | 50 psi |
| IonSpray Voltage (IS)  | 4000 V |
| Exit Potential (EP)    | 10 V   |

---

### **MS conditions negative mode**

MS system: 5500 QTrap (AB Sciex)

Generic settings:

---

|               |          |
|---------------|----------|
| Scan mode     | ESI-     |
| Scan type     | MRM      |
| Scheduled MRM | No       |
| Polarity      | negative |
| Dwell time    | 5 ms     |
| Resolution Q1 | unit     |
| Resolution Q3 | unit     |
| Settling time | 20 msec  |
| MR pause      | 5 msec   |

---

|                        |         |
|------------------------|---------|
| Curtain gas (CUR)      | 40 psi  |
| Collision gas (CAD)    | medium  |
| Temperature (TEM)      | 400 °C  |
| Ion Source Gas 1 (GS1) | 50 psi  |
| Ion Source Gas 2 (GS2) | 50 psi  |
| IonSpray Voltage (IS)  | -4000 V |
| Exit Potential (EP)    | -10 V   |

---
