# Supplementary material for: Mycotoxin profiling of 1000 beer samples with a special focus on craft beer
Source: PubMed Central journal article supplement (PMC5628871; doi:10.1371/journal.pone.0185887), 2017-10-05
Supplement: pone.0185887.s002.pdf [file pone.0185887.s002.pdf]

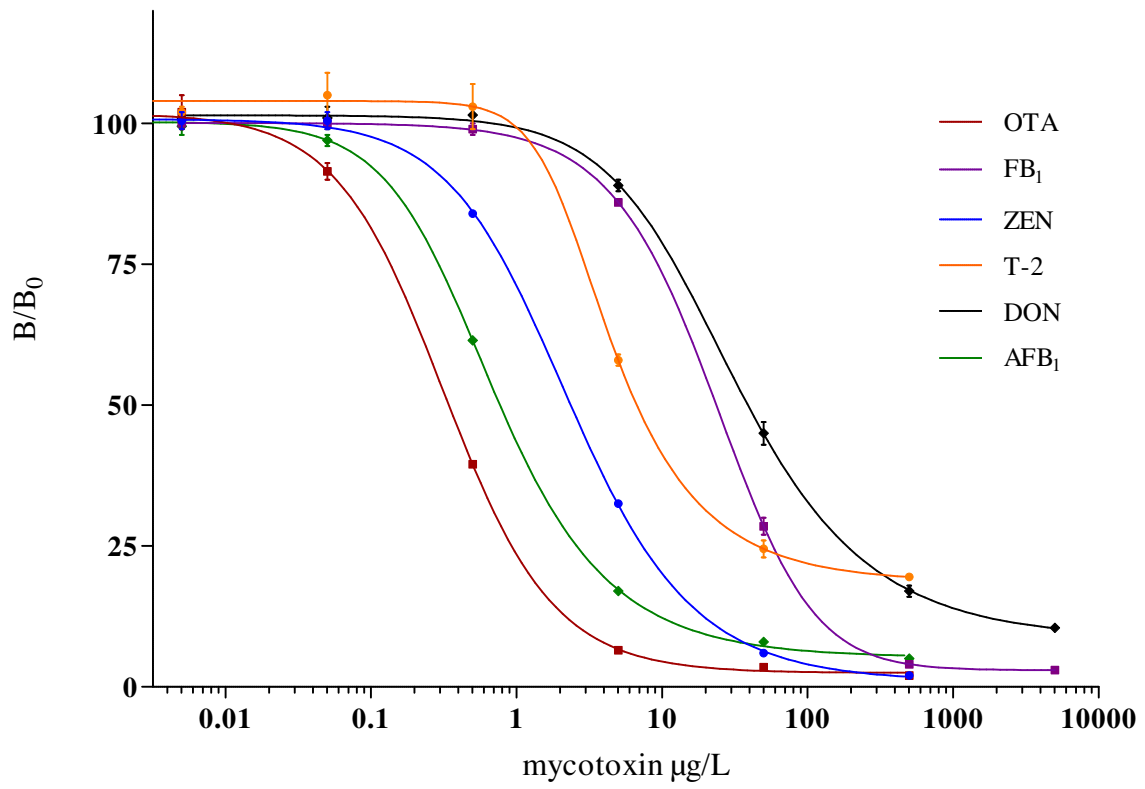

**S1 Fig.** Multi-mycotoxin dose-response curves in dark ale (n=2)
