# Supplementary material for: Mycotoxin profiling of 1000 beer samples with a special focus on craft beer
Source: PubMed Central journal article supplement (PMC5628871; doi:10.1371/journal.pone.0185887), 2017-10-05
Supplement: pone.0185887.s003.pdf [file pone.0185887.s003.pdf]

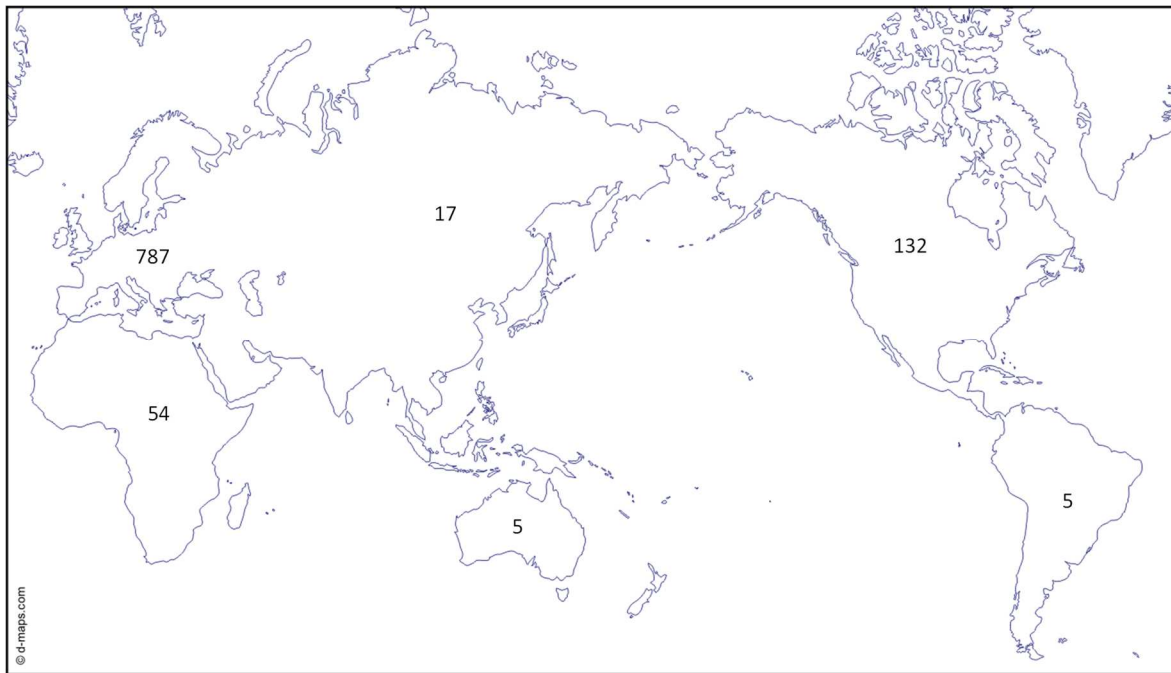

**S2 Fig. A** Global beer samples surveyed by region

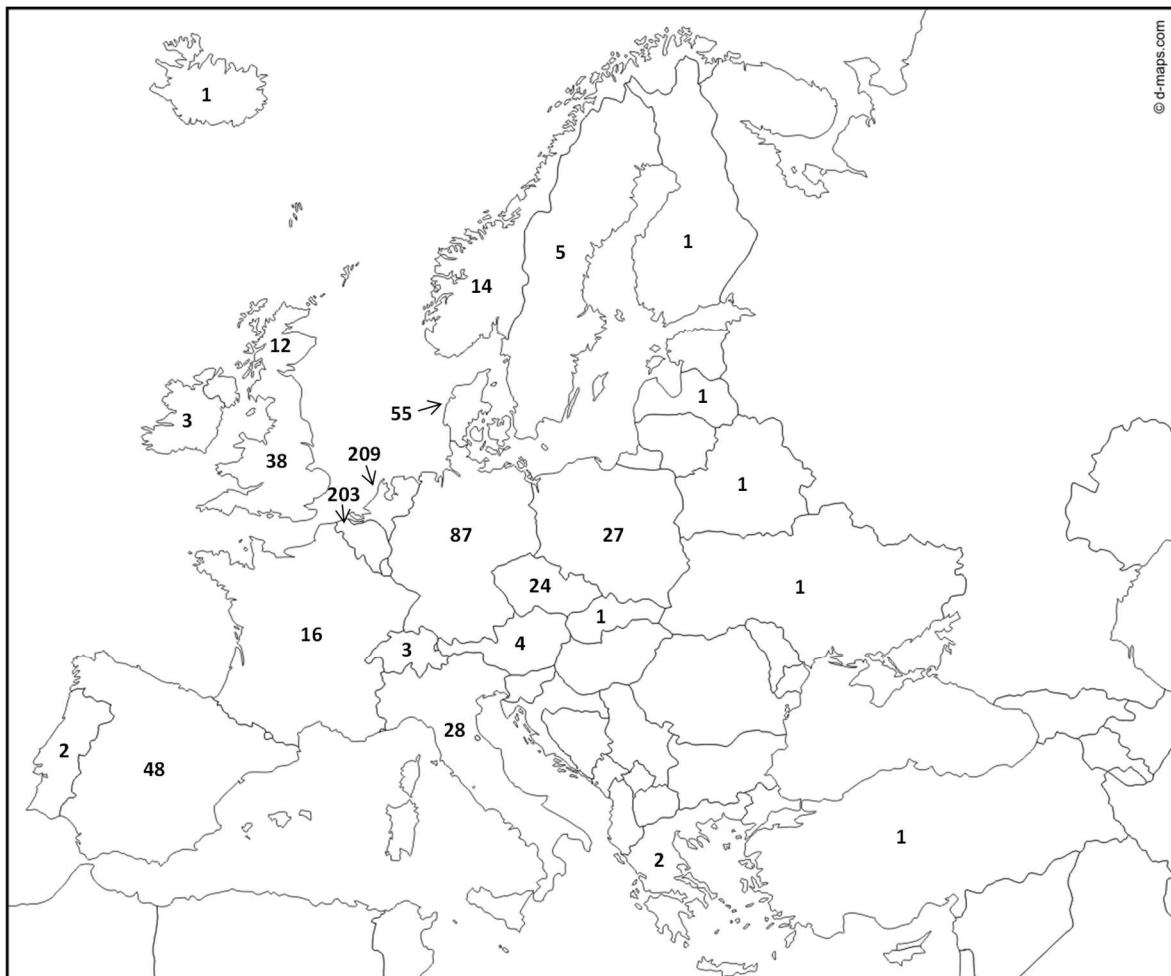

**S2 Fig. B** European beer samples surveyed by country
