# Supplementary material for: Mycotoxin profiling of 1000 beer samples with a special focus on craft beer
Source: PubMed Central journal article supplement (PMC5628871; doi:10.1371/journal.pone.0185887), 2017-10-05
Supplement: pone.0185887.s004.pdf [file pone.0185887.s004.pdf]

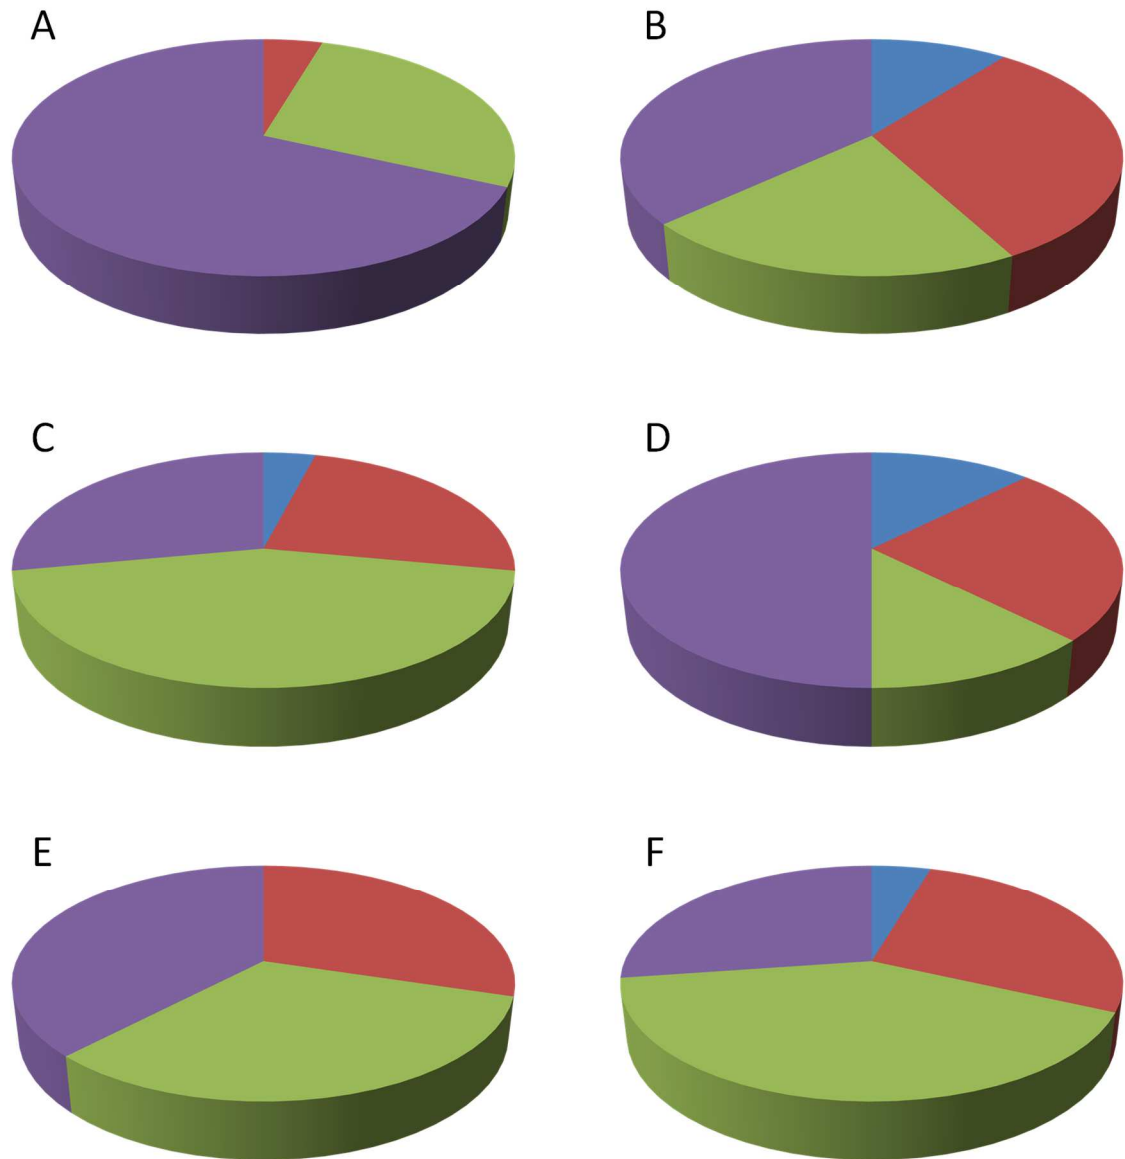

**S3 Fig.** Comparison of DON+D3G contaminations ( $\ge 100$ ,  $\ge 50$ ,  $\ge 25$  and  $< 25\ \mu\text{g/L}$ ) in pale versus dark beers in similar beer styles; (A) pale lager, (B) dark lager, (C) pale ale, (D) dark ale, (E) strong pale lager and (F) strong dark lager. Measured by 6-plex immunoassay.
