# Supplementary material for: Mycotoxin profiling of 1000 beer samples with a special focus on craft beer
Source: PubMed Central journal article supplement (PMC5628871; doi:10.1371/journal.pone.0185887), 2017-10-05
Supplement: pone.0185887.s005.pdf [file pone.0185887.s005.pdf]

**S1 Table A.** Mycotoxin specific MS/MS settings and standard addition (spike) levels for positive ionization mode

| Mycotoxin        | Q1<br>(m/z) | Q3<br>(m/z) | RT<br>(min) | DP<br>(V) | EP<br>(V) | CE<br>(V) | CXP<br>(V) | Spike<br>(µg/L) | Detection<br>range (µg/L) |
|------------------|-------------|-------------|-------------|-----------|-----------|-----------|------------|-----------------|---------------------------|
| DON              | 297.1       | 248.9       | 4.9         | 51        | 10        | 15        | 16         | 100             | 200 - 10                  |
|                  |             | 231.0       |             | 51        |           | 17        |            |                 |                           |
| 3/15 ADON        | 355.9       | 137.1       | 5.9         | 66        | 10        | 22        | 10         | 100             | 200 - 10                  |
|                  |             | 321.1       |             | 66        |           | 17        |            |                 |                           |
| AFB <sub>1</sub> | 313.0       | 285.2       | 7.7         | 101       | 10        | 33        | 16         | 0.5             | 1 - 0.05                  |
|                  |             | 128.1       |             | 101       |           | 91        |            |                 |                           |
| AFB <sub>2</sub> | 315.1       | 287.2       | 7.6         | 91        | 10        | 37        | 18         | 0.5             | 1 - 0.05                  |
|                  |             | 259.2       |             | 91        |           | 43        |            |                 |                           |
| AFG <sub>1</sub> | 329.0       | 243.2       | 7.2         | 81        | 10        | 39        | 14         | 0.25            | 0.5 – 0.025               |
|                  |             | 200.0       |             | 81        |           | 59        |            |                 |                           |
| AFG <sub>2</sub> | 331.1       | 313.2       | 7.0         | 106       | 10        | 35        | 18         | 0.5             | 1 - 0.05                  |
|                  |             | 245.2       |             | 106       |           | 43        |            |                 |                           |
| AFM <sub>1</sub> | 328.9       | 272.9       | 6.8         | 61        | 10        | 33        | 18         | 0.5             | 1 - 0.05                  |
|                  |             | 229.0       |             | 61        |           | 55        |            |                 |                           |
| OTA              | 404.0       | 239.0       | 9.00        | 86        | 10        | 37        | 16         | 3               | 6 - 0.3                   |
|                  |             | 102.0       |             | 86        |           | 105       |            |                 |                           |
| OTB              | 370.1       | 204.9       | 8.5         | 56        | 10        | 29        | 14         | 3               | 6 - 0.3                   |
|                  |             | 186.9       |             | 56        |           | 47        |            |                 |                           |
| FB <sub>1</sub>  | 722.5       | 352.3       | 8.2         | 116       | 10        | 55        | 12         | 10              | 20 - 1                    |
|                  |             | 334.4       |             | 116       |           | 57        |            |                 |                           |
| FB <sub>2</sub>  | 706.4       | 336.3       | 7.6         | 121       | 10        | 59        | 8          | 10              | 20 - 1                    |
|                  |             | 318.5       |             | 121       |           | 51        |            |                 |                           |
| FB <sub>3</sub>  | 706.3       | 336.3       | 8.6         | 121       | 10        | 59        | 8          | 10              | 20 - 1                    |
|                  |             | 318.5       |             | 121       |           | 51        |            |                 |                           |
| T-2              | 484.3       | 215.2       | 8.3         | 81        | 10        | 29        | 18         | 5               | 10 - 0.5                  |
|                  |             | 185.1       |             | 81        |           | 31        |            |                 |                           |
| HT-2             | 441.9       | 263.1       | 7.8         | 86        | 10        | 19        | 6          | 10              | 20 - 1                    |
|                  |             | 215.1       |             | 86        |           | 17        |            |                 |                           |
| T-2 triol        | 383.2       | 351.1       | 7.1         | 61        | 10        | 25        | 24         | 50              | 100 - 5                   |
|                  |             | 308.9       |             | 61        |           | 23        |            |                 |                           |
| T-2 tetraol      | 316.3       | 281.1       | 4.5         | 51        | 10        | 13        | 8          | 100             | 200 - 10                  |
|                  |             | 215.2       |             | 51        |           | 13        |            |                 |                           |
| α ZELG           | 483.1       | 321.2       | 7.8         | 61        | 10        | 13        | 4          | 5               | 10 - 0.5                  |
|                  |             | 303.0       |             | 61        |           | 17        |            |                 |                           |
| β ZELG           | 500.1       | 321.0       | 7.0         | 71        | 10        | 19        | 22         | 5               | 10 - 0.5                  |
|                  |             | 303.1       |             | 71        |           | 27        |            |                 |                           |
| Z14G             | 498         | 319.1       | 7.6         | 21        | 10        | 19        | 22         | 5               | 10 - 0.5                  |
|                  |             | 301.0       |             | 21        |           | 31        |            |                 |                           |

Q1 = Precursor ion

EP = Entrance Potential

Q3 = Product ions

CE = Collision Energy

RT = Retention time

CXP = Collision cell exit potential

DP = Declustering potential

**S1 Table B.** Mycotoxin specific MS/MS settings and standard addition (spike) levels for negative ionization mode

| <b>Mycotoxin</b> | <b>Q1<br/>(<i>m/z</i>)</b> | <b>Q3<br/>(<i>m/z</i>)</b> | <b>RT<br/>(min)</b> | <b>DP<br/>(V)</b> | <b>EP<br/>(V)</b> | <b>CE<br/>(V)</b> | <b>CXP<br/>(V)</b> | <b>Spike<br/>(<math>\mu\text{g/L}</math>)</b> | <b>Detection<br/>range (<math>\mu\text{g/L}</math>)</b> |
|------------------|----------------------------|----------------------------|---------------------|-------------------|-------------------|-------------------|--------------------|-----------------------------------------------|---------------------------------------------------------|
| ZEN              | 317.3                      | 175.0                      | 9.5                 | -125              | -10               | -32               | -15                | 3                                             | 6 - 0.3                                                 |
|                  |                            | 130.9                      |                     | -125              | -10               | -38               | -15                |                                               |                                                         |
| $\alpha$ ZEL     | 319.2                      | 160.0                      | 9.5                 | -110              | -10               | -44               | -13                | 20                                            | 40 - 2                                                  |
|                  |                            | 130.0                      |                     | -110              | -10               | -50               | -20                |                                               |                                                         |
| $\beta$ ZEL      | 319.3                      | 160.0                      | 9.1                 | -110              | -10               | -44               | -13                | 20                                            | 40 - 2                                                  |
|                  |                            | 130.0                      |                     | -110              | -10               | -50               | -20                |                                               |                                                         |
| Z14S             | 397.2                      | 316.9                      | 7.8                 | -55               | -10               | -30               | -21                | 5                                             | 10 - 0.5                                                |
|                  |                            | 175.0                      |                     | -55               | -10               | -46               | -11                |                                               |                                                         |
| NIV              | 371.1                      | 281.0                      | 5.0                 | -55               | -10               | -20               | -19                | 50                                            | 100 - 5                                                 |
|                  |                            | 311.0                      |                     | -55               | -10               | -14               | -21                |                                               |                                                         |
| D3G              | 517.2                      | 457.1                      | 5.4                 | -45               | -10               | -18               | -13                | 25                                            | 50 - 2.5                                                |
|                  |                            | 247.0                      |                     | -45               | -10               | -32               | -17                |                                               |                                                         |

Q1 = Precursor ion

EP = Entrance Potential

Q3 = Product ions

CE = Collision Energy

RT = Retention time

CXP = Collision cell exit potential

DP = Declustering potential
