# Supplementary material for: Mycotoxin profiling of 1000 beer samples with a special focus on craft beer
Source: PubMed Central journal article supplement (PMC5628871; doi:10.1371/journal.pone.0185887), 2017-10-05
Supplement: pone.0185887.s006.pdf [file pone.0185887.s006.pdf]

**S2 Table** Intra- and interday precision of the 6-plex assay (%RSD) for fortified samples (in dark ale<sup>a</sup>)

| <b>Precision</b> | <b>n</b> | <b>AFB<sub>1</sub></b><br>(0.5 µg/L) | <b>DON</b><br>(100 µg/L) | <b>FB<sub>1</sub></b><br>(100 µg/L) | <b>OTA</b><br>(2 µg/L) | <b>T-2</b><br>(50 µg/L) | <b>ZEN</b><br>(50 µg/L) |
|------------------|----------|--------------------------------------|--------------------------|-------------------------------------|------------------------|-------------------------|-------------------------|
| Intraday 1       | 11       | 7.5                                  | 4.3                      | 6.7                                 | 3.7                    | 10.9                    | 5.9                     |
| Intraday 2       | 6        | 3.6                                  | 8.1                      | 8.3                                 | 10.6                   | 16.7                    | 5.8                     |
| Interday         | 17       | 6.5                                  | 6.5                      | 7.7                                 | 7.4                    | 18.4                    | 8.5                     |

<sup>a</sup> n = the total number of fortified dark ale samples
