# Supplementary material for: Mycotoxin profiling of 1000 beer samples with a special focus on craft beer
Source: PubMed Central journal article supplement (PMC5628871; doi:10.1371/journal.pone.0185887), 2017-10-05
Supplement: pone.0185887.s007.pdf [file pone.0185887.s007.pdf]

**S3 Table** Intra- and interday (intraday 1+2) IC50s based on multi-mycotoxin dose-response curves in dark ale (n=2) <sup>a</sup>

|            | Experiment | Mycotoxin concentration (µg/L) |     |                 |     |     |     |
|------------|------------|--------------------------------|-----|-----------------|-----|-----|-----|
|            |            | AFB <sub>1</sub>               | DON | FB <sub>1</sub> | OTA | T-2 | ZEN |
| Intraday 1 | 1          | 0.7                            | 31  | 23              | 0.3 | 4.5 | 2.3 |
|            | 2          | 0.7                            | 31  | 17              | 0.3 | 4.9 | 2.2 |
|            | 3          | 0.6                            | 29  | 11              | 0.2 | 4.7 | 2.2 |
|            |            |                                |     |                 |     |     |     |
| Intraday 2 | 1          | 0.6                            | 24  | 10              | 0.3 | 3.6 | 1.6 |
|            | 2          | 0.7                            | 28  | 9               | 0.3 | 4.1 | 1.6 |
|            | 3          | 0.6                            | 20  | 8               | 0.3 | 3.3 | 1.5 |
|            |            |                                |     |                 |     |     |     |
| Median     | -          | 0.7                            | 28  | 10              | 0.3 | 4.3 | 1.9 |

<sup>a</sup> n = the total number of replicates for each dose-response curve
