# Supplementary material for: Mycotoxin profiling of 1000 beer samples with a special focus on craft beer
Source: PubMed Central journal article supplement (PMC5628871; doi:10.1371/journal.pone.0185887), 2017-10-05
Supplement: pone.0185887.s008.pdf [file pone.0185887.s008.pdf]

**S4 Table** Intra- and interday determinations of mycotoxin concentrations in a multi-fortified dark ale using the 6-plex assay<sup>a</sup>

| Mycotoxin        | Mycotoxin concentration (µg/L) |                   |        |                  |        |                 |        |
|------------------|--------------------------------|-------------------|--------|------------------|--------|-----------------|--------|
|                  | Spike                          | Intraday 1 (n=11) |        | Intraday 2 (n=6) |        | Interday (n=17) |        |
|                  |                                | Average           | Median | Average          | Median | Average         | Median |
| AFB <sub>1</sub> | 0.5                            | 0.7               | 0.6    | 0.7              | 0.7    | 0.7             | 0.6    |
| DON              | 100                            | 126               | 122    | 116              | 125    | 122             | 124    |
| FB <sub>1</sub>  | 100                            | 286               | 275    | 385              | 414    | 321             | 282    |
| OTA              | 2                              | 3.3               | 3.3    | 2.9              | 2.9    | 3.2             | 3.2    |
| T-2              | 50                             | 48                | 48     | 54               | 54     | 50              | 48     |
| ZEN              | 50                             | 61                | 58     | 69               | 69     | 64              | 64     |

<sup>a</sup> n = the total number of fortified dark ale samples
