# Supplementary material for: Mycotoxin profiling of 1000 beer samples with a special focus on craft beer
Source: PubMed Central journal article supplement (PMC5628871; doi:10.1371/journal.pone.0185887), 2017-10-05
Supplement: pone.0185887.s009.pdf [file pone.0185887.s009.pdf]

**S5 Table. A 6-plex immunoassay screening data African traditional beers**

| Sample Number | Designated Style | Craft | Country      | %ABV | Mycotoxins (µg/L) |     |     |     |     |                 |
|---------------|------------------|-------|--------------|------|-------------------|-----|-----|-----|-----|-----------------|
|               |                  |       |              |      | AFB <sub>1</sub>  | DON | ZEN | T-2 | OTA | FB <sub>1</sub> |
| 272           | Maize homebrew   | Yes   | South Africa | nd   | -                 | -   | 1.2 | 9   | 0.3 | 27              |
| 273           | Maize homebrew   | Yes   | South Africa | nd   | -                 | -   | 1.2 | -   | -   | -               |
| 274           | Maize homebrew   | Yes   | South Africa | nd   | -                 | 41  | -   | -   | 0.2 | 18              |
| 278           | Traditional Ale  | No    | Zimbabwe     | 6.0  | -                 | -   | -   | -   | -   | 376             |
| 362           | Mqombothi        | Yes   | South Africa | 9.4  | -                 | 12  | -   | -   | 0.2 | 9               |
| 407           | Mqombothi        | Yes   | South Africa | 4.0  | -                 | -   | -   | -   | -   | 30              |
| 409           | Sorghum          | Yes   | South Africa | nd   | -                 | 1   | -   | -   | -   | 17              |
| 410           | Sorghum          | Yes   | South Africa | nd   | -                 | -   | -   | -   | -   | 17              |
| 411           | Sorghum          | Yes   | South Africa | nd   | -                 | 58  | -   | -   | -   | 8               |
| 412           | Sorghum          | Yes   | South Africa | nd   | -                 | 30  | -   | -   | -   | 12              |
| 413           | Sorghum          | Yes   | South Africa | nd   | -                 | 31  | -   | -   | -   | 17              |
| 414           | Sorghum          | Yes   | South Africa | nd   | -                 | 95  | -   | -   | -   | 12              |
| 415           | Sorghum          | Yes   | South Africa | nd   | -                 | 7   | -   | -   | -   | 17              |
| 416           | Sorghum          | Yes   | South Africa | nd   | -                 | -   | -   | -   | -   | 5               |
| 417           | Mqombothi        | Yes   | South Africa | nd   | -                 | 107 | -   | -   | -   | 11              |
| 418           | Mqombothi        | Yes   | South Africa | nd   | -                 | 112 | -   | -   | -   | 8               |
| 419           | Mqombothi        | Yes   | South Africa | nd   | -                 | -   | -   | -   | -   | 12              |
| 420           | Mqombothi        | Yes   | South Africa | nd   | -                 | 107 | -   | -   | -   | 10              |
| 421           | Mqombothi        | Yes   | South Africa | nd   | -                 | -   | -   | -   | -   | 24              |
| 422           | Mqombothi        | Yes   | South Africa | nd   | -                 | 12  | -   | -   | -   | 9               |
| 423           | Mqombothi        | Yes   | South Africa | nd   | -                 | 10  | -   | -   | -   | 81              |
| 424           | Mqombothi        | Yes   | South Africa | nd   | -                 | -   | -   | -   | -   | 9               |
| 425           | Mqombothi        | Yes   | South Africa | nd   | -                 | 100 | -   | -   | -   | 8               |
| 426           | Mqombothi        | Yes   | South Africa | nd   | -                 | 56  | -   | -   | -   | 16              |
| 427           | Mqombothi        | Yes   | South Africa | nd   | -                 | 91  | -   | -   | -   | 15              |
| 428           | Mqombothi        | Yes   | South Africa | nd   | -                 | 43  | -   | -   | -   | 15              |
| 429           | Mqombothi        | Yes   | South Africa | nd   | -                 | -   | -   | -   | -   | 25              |
| 430           | Mqombothi        | Yes   | South Africa | nd   | -                 | 57  | -   | -   | -   | 16              |
| 451           | Traditional Ale  | Yes   | South Africa | nd   | -                 | -   | -   | 1   | -   | 28              |
| 452           | Traditional Ale  | Yes   | South Africa | nd   | -                 | -   | -   | -   | -   | 33              |
| 453           | Traditional Ale  | Yes   | South Africa | nd   | -                 | -   | -   | -   | -   | 95              |

- = no mycotoxins detected

**S5 Table. B** 6-plex immunoassay screening data bock beers

| Sample number | Designated Style | Craft | Country       | %ABV | Mycotoxins (µg/L) |     |     |     |     |                 |
|---------------|------------------|-------|---------------|------|-------------------|-----|-----|-----|-----|-----------------|
|               |                  |       |               |      | AFB <sub>1</sub>  | DON | ZEN | T-2 | OTA | FB <sub>1</sub> |
| 29            | Bock             | Yes   | Netherlands   | 7.0  | -                 | 50  | -   | -   | 0.3 | 4               |
| 49            | Heller Bock      | No    | Netherlands   | 8.5  | -                 | 5   | -   | -   | 0.3 | -               |
| 169           | DoppelBock       | No    | Germany       | 7.8  | -                 | 68  | -   | -   | 0.3 | -               |
| 210           | Bock             | No    | Netherlands   | 4.5  | -                 | -   | -   | -   | 0.1 | 1               |
| 220           | DoppelBock       | No    | Germany       | 7.1  | -                 | 56  | -   | -   | 0.3 | 4               |
| 224           | Bock             | Yes   | Netherlands   | 6.5  | -                 | -   | -   | -   | 0.4 | -               |
| 238           | DoppelBock       | No    | Poland        | 10.0 | -                 | 97  | -   | -   | -   | -               |
| 249           | Dunkler Bock     | Yes   | United States | 5.5  | -                 | 29  | 0.9 | -   | 0.3 | -               |
| 316           | Dunkler Bock     | Yes   | Denmark       | 6.5  | -                 | 41  | -   | -   | 0.3 | 10              |
| 325           | DoppelBock       | Yes   | Norway        | 8.5  | 0.3               | 53  | -   | 13  | 0.8 | 37              |
| 436           | Dunkler Bock     | Yes   | Netherlands   | 6.5  | -                 | 14  | -   | 10  | -   | 53              |
| 456           | Heller Bock      | No    | Germany       | 7.0  | -                 | 23  | 1.0 | 5   | 0.1 | 2               |
| 494           | Heller Bock      | No    | Italy         | 7.1  | -                 | 28  | -   | -   | 0.2 | 6               |
| 502           | DoppelBock       | No    | Germany       | 7.4  | 0.2               | 28  | -   | -   | 0.2 | 1               |
| 506           | Dunkler Bock     | No    | Netherlands   | 6.5  | 0.4               | 21  | -   | 1   | 0.2 | 1               |
| 510           | Dunkler Bock     | No    | Netherlands   | 6.5  | -                 | 10  | -   | -   | 0.2 | -               |
| 512           | Dunkler Bock     | Yes   | Netherlands   | 6.5  | 0.7               | 24  | -   | 1   | 0.2 | 1               |
| 513           | Dunkler Bock     | Yes   | Netherlands   | 6.2  | 0.2               | -   | -   | -   | 0.2 | -               |
| 514           | Dunkler Bock     | Yes   | Belgium       | 6.5  | -                 | 1   | -   | -   | 0.1 | -               |
| 515           | Dunkler Bock     | No    | Netherlands   | 7.0  | -                 | 13  | -   | -   | -   | -               |
| 516           | DoppelBock       | No    | Netherlands   | 7.5  | -                 | 9   | -   | -   | -   | -               |
| 518           | DoppelBock       | No    | Netherlands   | 7.5  | -                 | -   | -   | -   | 0.1 | -               |
| 519           | Dunkler Bock     | No    | Germany       | 7.2  | -                 | -   | -   | 1   | 0.1 | -               |
| 520           | Dunkler Bock     | No    | Netherlands   | 7.0  | -                 | 27  | -   | -   | 0.2 | -               |
| 521           | Dunkler Bock     | Yes   | Netherlands   | 6.5  | 0.8               | 24  | -   | -   | 0.1 | 1               |
| 523           | Dunkler Bock     | Yes   | Netherlands   | 6.5  | 1.2               | 34  | -   | -   | -   | 148             |
| 532           | Helles Bock      | Yes   | Netherlands   | 6.0  | -                 | -   | 0.8 | 8   | 0.2 | 21              |
| 535           | Bock             | Yes   | Netherlands   | 6.0  | -                 | 21  | 0.9 | 6   | 0.3 | 35              |
| 570           | Dunkler Bock     | Yes   | Netherlands   | 7.5  | 1.3               | 11  | -   | 3   | 0.1 | 30              |
| 659           | Dunkler Bock     | Yes   | Netherlands   | 7.5  | -                 | -   | -   | 4   | 0.3 | 1               |
| 711           | Bock             | No    | Belgium       | 6.5  | -                 | -   | -   | -   | 0.2 | -               |
| 846           | Heller Bock      | No    | Germany       | 5.8  | -                 | -   | 0.2 | -   | 0.6 | 1               |
| 859           | Dunkler Bock     | Yes   | USA           | 5.5  | -                 | -   | -   | -   | -   | -               |
| 868           | Dunkler Bock     | No    | Germany       | 5.8  | -                 | -   | -   | -   | 0.1 | -               |
| 870           | Specialty Grain  | Yes   | Netherlands   | 7.0  | -                 | -   | -   | -   | 0.1 | -               |
| 901           | DoppelBock       | Yes   | Nederland     | 11.5 | -                 | 38  | -   | -   | 0.4 | -               |
| 902           | Dunkler Bock     | Yes   | Nederland     | 6.5  | 0.2               | -   | -   | -   | 0.3 | -               |
| 921           | Heller Bock      | No    | Germany       | 8.0  | 1.1               | -   | 0.2 | -   | -   | -               |

- = no mycotoxins detected

**S5 Table. C 6-plex immunoassay screening data dark ale beers**

| Sample number | Designated Style        | Craft | Country        | %ABV | Mycotoxins (µg/L) |     |     |     |     |                 |
|---------------|-------------------------|-------|----------------|------|-------------------|-----|-----|-----|-----|-----------------|
|               |                         |       |                |      | AFB <sub>1</sub>  | DON | ZEN | T-2 | OTA | FB <sub>1</sub> |
| 2             | Belgian Strong Dark Ale | No    | Belgium        | 8.5  | -                 | 36  | -   | -   | -   | 6               |
| 38            | Abbey Dubbel            | Yes   | Belgium        | 7.0  | -                 | -   | -   | -   | 0.3 | -               |
| 53            | Double                  | Yes   | Netherlands    | 6.5  | -                 | 20  | -   | -   | -   | 4               |
| 116           | Belgian Ale             | Yes   | Belgium        | 7.0  | -                 | 46  | -   | -   | 0.5 | 10              |
| 167           | Belgian Strong Ale      | No    | Belgium        | 8.0  | -                 | -   | 4.1 | -   | 0.3 | -               |
| 200           | Old Ale                 | Yes   | England        | 6.0  | -                 | 134 | 0.7 | -   | 0.4 | -               |
| 216           | Abbey Dubbel            | Yes   | Poland         | 7.0  | -                 | 40  | -   | -   | 0.3 | 3               |
| 314           | Brown Ale               | Yes   | United States  | 5.5  | -                 | 99  | -   | 2   | 0.3 | 15              |
| 321           | Old Ale                 | Yes   | England        | 7.3  | -                 | 44  | -   | -   | 0.3 | 10              |
| 338           | Brown Ale               | Yes   | Japan          | 6.2  | -                 | 63  | -   | -   | 0.3 | 13              |
| 341           | Old Ale                 | Yes   | Scotland       | 8.0  | -                 | 121 | -   | -   | -   | 22              |
| 361           | Mild Ale                | Yes   | Norway         | 4.5  | -                 | -   | -   | 3   | 0.4 | 14              |
| 381           | Brown Ale               | Yes   | Norway         | 4.5  | -                 | 67  | -   | 3   | 0.7 | 17              |
| 434           | Abbey Dubbel            | No    | Belgium        | 8.0  | -                 | -   | -   | 3   | -   | -               |
| 439           | Brown Ale               | No    | England        | 4.7  | -                 | -   | -   | 11  | -   | 23              |
| 461           | Belgian Strong Ale      | No    | Belgium        | 8.5  | -                 | 25  | 1.1 | 3   | -   | 26              |
| 464           | Abbey Dubbel            | No    | Belgium        | 6.7  | -                 | -   | 0.2 | 4   | -   | 4               |
| 467           | Abbey Dubbel            | Yes   | Netherlands    | 6.5  | -                 | 10  | 2.6 | 5   | -   | 17              |
| 507           | Belgian Strong Ale      | Yes   | Belgium        | 7.5  | -                 | -   | -   | -   | -   | -               |
| 524           | Belgian Strong Ale      | Yes   | Netherlands    | 7.0  | -                 | 7   | -   | 4   | 0.2 | 45              |
| 544           | Abbey dubbel            | No    | Belgium        | 6.3  | -                 | 15  | -   | 8   | 0.3 | 42              |
| 545           | Brown Ale               | No    | Netherlands    | 11.0 | -                 | -   | -   | 6   | 0.1 | 46              |
| 557           | Abbey dubbel            | No    | Belgium        | 8.0  | 0.3               | -   | -   | 2   | 0.2 | 4               |
| 572           | Abbey dubbel            | Yes   | Netherlands    | 7.0  | 1.3               | 10  | -   | 2   | 0.2 | 32              |
| 697           | Abbey Dubbel            | No    | Belgium        | 7.0  | -                 | -   | -   | 2   | 0.2 | -               |
| 738           | Dunckler                | No    | Czech republic | 7.5  | -                 | 20  | -   | 4   | 0.2 | 7               |
| 739           | Brown Ale               | Yes   | Japan          | 6.2  | -                 | -   | -   | 8   | 0.3 | 1               |
| 741           | Brown Ale               | Yes   | USA            | 6.8  | -                 | -   | -   | 1   | 0.2 | 3               |
| 750           | Brown Ale               | Yes   | Denmark        | 7.0  | -                 | 1   | -   | 3   | 0.4 | 4               |
| 779           | Brown Ale               | Yes   | Denmark        | 5.8  | -                 | 5   | -   | -   | 0.3 | 5               |
| 790           | Specialty Grain         | Yes   | Netherlands    | 7.5  | -                 | 58  | -   | -   | 0.7 | 4               |
| 838           | Abey dubbel             | No    | Belgium        | 6.5  | -                 | -   | 0.1 | 1   | 0.5 | 4               |
| 839           | Abey dubbel             | No    | Netherlands    | 7.5  | -                 | -   | -   | -   | 0.5 | -               |
| 899           | Abbey Dubbel            | Yes   | Nederland      | 6.5  | 0.1               | -   | -   | -   | 0.3 | -               |
| 918           | Belgian Strong Dark Ale | Yes   | Belgium        | 8.0  | 1.1               | -   | -   | 2   | -   | 1               |
| 924           | Dunkel Lager            | No    | Poland         | 7.5  | -                 | -   | -   | -   | -   | 9               |
| 961           | Dark Ale                | Yes   | Belgium        | 8.2  | -                 | 1   | -   | -   | -   | -               |

- = no mycotoxins detected

**S5 Table. D** 6-plex immunoassay screening data dark lager beers

| Sample number | Designated Style | Craft | Country        | %ABV | Mycotoxins (µg/L) |     |     |     |     |                 |
|---------------|------------------|-------|----------------|------|-------------------|-----|-----|-----|-----|-----------------|
|               |                  |       |                |      | AFB <sub>1</sub>  | DON | ZEN | T-2 | OTA | FB <sub>1</sub> |
| 33            | Schwarzbier      | No    | Germany        | 5.0  | -                 | 41  | -   | -   | 0.4 | 9               |
| 99            | Schwarzbier      | No    | Germany        | 4.8  | -                 | 18  | -   | -   | 0.5 | 20              |
| 123           | Dark beer        | No    | Czech Republic | 3.6  | -                 | 93  | 0.2 | -   | 0.5 | 18              |
| 124           | Dark beer        | No    | Czech Republic | 3.8  | 0.8               | 106 | -   | 4   | 0.3 | 10              |
| 128           | Dark Lager       | No    | Czech Republic | 4.4  | -                 | 8   | -   | 3   | 0.4 | 7               |
| 129           | Dark Lager       | No    | Czech Republic | 4.5  | -                 | 81  | 0.2 | 3   | 0.3 | 9               |
| 130           | Dark Lager       | No    | Czech Republic | 4.5  | -                 | 9   | -   | 3   | 0.4 | 16              |
| 131           | Semi-Dark Lager  | No    | Czech Republic | 4.6  | -                 | 17  | -   | 4   | 0.2 | 15              |
| 132           | Dark Lager       | No    | Czech Republic | 4.7  | -                 | 17  | 0.1 | 6   | 0.4 | 37              |
| 134           | Dark Lager       | No    | Czech Republic | 4.8  | -                 | 119 | -   | 4   | 0.4 | 26              |
| 135           | Dark Lager       | No    | Czech Republic | 5.2  | -                 | 57  | -   | 2   | 0.4 | 16              |
| 136           | Semi-Dark Lager  | No    | Czech Republic | 5.3  | -                 | 57  | -   | 1   | 0.4 | 5               |
| 137           | Dark beer        | No    | Czech Republic | 6.3  | -                 | 11  | -   | 1   | 0.3 | 6               |
| 154           | Dunkel/ Vienna   | No    | Slovakia       | 4.5  | -                 | 67  | -   | -   | 0.3 | 15              |
| 161           | Dark Lager       | No    | Greece         | 5.5  | -                 | 20  | -   | -   | 0.3 | 5               |
| 193           | Schwarzbier      | No    | Czech Republic | 3.8  | -                 | 33  | -   | -   | 0.4 | 3               |
| 196           | Schwarzbier      | No    | Czech Republic | 3.7  | -                 | -   | 0.2 | -   | 0.3 | 3               |
| 387           | Dunkel Lager     | No    | Mexico         | 6.0  | -                 | -   | -   | -   | 0.3 | 14              |
| 391           | Dunkel           | No    | Spain          | 6.2  | -                 | -   | -   | 1   | 0.3 | 24              |
| 396           | Schwarzbier      | No    | Spain          | 4.8  | -                 | 23  | -   | 1   | 0.3 | 28              |
| 401           | Dunkel           | No    | Spain          | 5.5  | -                 | 45  | 0.6 | -   | 0.4 | 33              |
| 554           | Dunkel Lager     | Yes   | Netherlands    | 5.0  | -                 | 11  | -   | 3   | 0.3 | 18              |
| 623           | Dunkel           | No    | Ukraine        | 4.1  | -                 | 3   | -   | 5   | 0.1 | 3               |
| 803           | Schwarzbier      | No    | Netherlands    | 5.2  | 3.7               | -   | -   | 8   | -   | 20              |
| 807           | Schwarzbier      | No    | Czech Republic | 3.8  | -                 | -   | -   | -   | -   | -               |
| 880           | Dunkel Lager     | No    | Poland         | 4.1  | -                 | 48  | 0.2 | 3   | 0.5 | 4               |
| 890           | Dunkel Lager     | No    | Spain          | 5.4  | -                 | -   | -   | -   | 0.2 | 3               |
| 1026          | Dunkel           | No    | Spain          | 5.5  | -                 | 23  | -   | -   | 0.1 | 19              |

- = no mycotoxins detected

**S5 Table E.** 6-plex immunoassay screening data double India pale ale beers

| Sample Number | Designated Style                          | Craft | Country       | %ABV | Mycotoxins (µg/L) |     |     |     |     |                 |
|---------------|-------------------------------------------|-------|---------------|------|-------------------|-----|-----|-----|-----|-----------------|
|               |                                           |       |               |      | AFB <sub>1</sub>  | DON | ZEN | T-2 | OTA | FB <sub>1</sub> |
| 212           | American Double / Imperial India Pale Ale | Yes   | United States | 8.0  | -                 | -   | -   | -   | 0.3 | -               |
| 315           | Imperial/Double India Pale Ale            | Yes   | Denmark       | 13.0 | -                 | 55  | 0.1 | -   | 0.2 | 13              |
| 330           | Imperial India Pale Ale                   | Yes   | Norway        | 10.0 | 0.1               | 78  | -   | -   | 0.7 | 30              |
| 335           | Imperial/Double India Pale Ale            | Yes   | United States | 10.0 | -                 | 52  | -   | -   | 0.3 | 4               |
| 348           | Imperial India Pale Ale                   | Yes   | Belgium       | 9.0  | -                 | 54  | -   | -   | -   | 3               |
| 362           | Imperial IPA                              | Yes   | Denmark       | 9.4  | -                 | 12  | -   | -   | 0.2 | 9               |
| 366           | Black India Pale Ale                      | Yes   | Netherlands   | 8.0  | -                 | 97  | -   | 3   | 0.2 | 11              |
| 527           | India Pale Ale                            | Yes   | Netherlands   | 9.2  | 1.0               | 20  | 1.4 | -   | 0.1 | 18              |
| 580           | Imperial/ Double IPA                      | Yes   | USA           | 8.0  | 0.6               | 9   | -   | -   | 0.2 | 9               |
| 592           | Imperial India Pale Ale                   | Yes   | USA           | 9.5  | 0.3               | 23  | -   | -   | 0.2 | 18              |
| 617           | Imperial/ Double IPA                      | Yes   | Belgium       | 9.0  | -                 | 8   | -   | 1   | 0.3 | 2               |
| 622           | India Pale Ale                            | Yes   | Scotland      | 8.5  | -                 | -   | -   | -   | 0.3 | -               |
| 658           | India Pale Ale                            | Yes   | USA           | 8.3  | 0.6               | 5   | -   | -   | 0.3 | -               |
| 672           | Imperial India Pale Ale                   | Yes   | USA           | 9.0  | -                 | 2   | -   | -   | 0.2 | 4               |
| 688           | Imperial India Pale Ale                   | Yes   | Scotland      | 7.5  | -                 | -   | -   | -   | 0.2 | 1               |
| 715           | Imperial India Pale Ale                   | Yes   | France        | 8.0  | -                 | 3   | -   | 3   | 0.3 | 1               |
| 726           | Imperial India Pale Ale                   | Yes   | USA           | 8.2  | -                 | -   | 1.6 | 4   | 0.3 | 1               |
| 754           | Imperial India Pale Ale                   | Yes   | USA           | 8.5  | -                 | -   | -   | 1   | 0.1 | 1               |
| 863           | India Pale Ale                            | Yes   | Germany       | 8.0  | -                 | -   | -   | -   | 0.1 | -               |
| 877           | Imperial India Pale Ale                   | Yes   | USA           | 8.7  | -                 | -   | -   | -   | -   | -               |
| 885           | Black IPA                                 | Yes   | Netherlands   | 8.0  | -                 | 12  | -   | -   | 0.5 | 1               |
| 904           | Imperial India Pale Ale                   | Yes   | Belgium       | 8.0  | 2.3               | -   | 0.8 | -   | -   | 8               |
| 907           | Imperial India Pale Ale                   | Yes   | Germany       | 8.6  | 0.8               | -   | -   | -   | -   | 5               |
| 909           | Imperial India Pale Ale                   | Yes   | Nederland     | 7.9  | 3                 | -   | 0.8 | -   | -   | 4               |
| 951           | Double IPA                                | Yes   | Nederland     | 8.2  | -                 | -   | -   | -   | -   | -               |
| 957           | Imperial India Pale Ale                   | Yes   | USA           | 8.0  | -                 | -   | -   | -   | -   | -               |
| 967           | Imperial India Pale Ale                   | Yes   | Switzerland   | 9.0  | -                 | -   | -   | -   | 0.2 | -               |
| 979           | Imperial India Pale Ale                   | Yes   | USA           | 9.2  | -                 | -   | -   | 2   | -   | -               |
| 998           | Imperial India Pale Ale                   | Yes   | Italy         | 9.5  | -                 | -   | -   | -   | -   | -               |
| 999           | Imperial India Pale Ale                   | Yes   | France        | 8.0  | -                 | -   | -   | -   | -   | -               |

- = no mycotoxins detected

**S5 Table. F 6-plex immunoassay screening data eisbock beers**

| Number | Designated Style | Craft | Country     | % ABV | Mycotoxins (µg/L) |     |     |     |     |                 |
|--------|------------------|-------|-------------|-------|-------------------|-----|-----|-----|-----|-----------------|
|        |                  |       |             |       | AFB <sub>1</sub>  | DON | ZEN | T-2 | OTA | FB <sub>1</sub> |
| 351    | Imperial Stout   | Yes   | Belgium     | 39.0  | -                 | 41  | -   | -   | -   | -               |
| 517    | EisBock          | Yes   | Netherlands | 9.3   | 1.0               | 14  | -   | -   | 0.2 | -               |
| 599    | Imperial Stout   | Yes   | Belgium     | 26.0  | 2.9               | 308 | -   | -   | 0.2 | 60              |
| 834    | Weizen Bock      | No    | Germany     | 12.0  | -                 | 27  | -   | -   | 0.5 | 7               |
| 1022   | EisBock          | Yes   | Netherlands | 25.0  | -                 | 14  | -   | -   | -   | -               |
| 1044   | IPA EisBock      | Yes   | Scotland    | 35.0  | -                 | 1   | -   | -   | -   | -               |

- = no mycotoxins detected

**S5 Table. G 6-plex immunoassay screening data fruit/vegetable/spice beers**

| Sample number | Designated Style       | Craft | Country      | %ABV | Mycotoxins (µg/L) |     |     |     |     |                 |
|---------------|------------------------|-------|--------------|------|-------------------|-----|-----|-----|-----|-----------------|
|               |                        |       |              |      | AFB <sub>1</sub>  | DON | ZEN | T-2 | OTA | FB <sub>1</sub> |
| 13            | Fruit / Vegetable Beer | No    | Netherlands  | 4.8  | -                 | 2   | -   | -   | -   | 5               |
| 34            | Herbed / Spiced Beer   | Yes   | Netherlands  | 8.5  | -                 | 28  | -   | -   | 0.2 | -               |
| 56            | Herbed / Spiced Beer   | Yes   | Belgium      | 7.5  | -                 | -   | -   | -   | 0.2 | -               |
| 57            | Fruit / Vegetable Beer | No    | Germany      | 2.5  | -                 | 99  | -   | -   | -   | 15              |
| 60            | Fruit / Vegetable Beer | No    | Netherlands  | 4.0  | -                 | -   | -   | -   | -   | 8               |
| 95            | Fruit / Vegetable Beer | Yes   | Netherlands  | 7.0  | -                 | 19  | -   | -   | 0.4 | 17              |
| 155           | Fruit / Vegetable Beer | Yes   | England      | 5.1  | -                 | 46  | -   | -   | -   | 7               |
| 187           | Fruit / Vegetable Beer | Yes   | Poland       | 5.5  | -                 | 70  | 0.3 | -   | 0.4 | 3               |
| 195           | Fruit / Vegetable Beer | No    | Germany      | 2.5  | -                 | 47  | -   | -   | 0.4 | 2               |
| 225           | Fruit / Vegetable Beer | No    | Belgium      | 5.0  | -                 | -   | 0.4 | -   | 2.3 | 4               |
| 242           | Fruit / Vegetable Beer | No    | Germany      | 2.5  | -                 | 127 | -   | -   | -   | -               |
| 323           | American Pale Ale      | Yes   | Norway       | 5.5  | -                 | 63  | -   | -   | 0.3 | 9               |
| 403           | Fruit Ale              | No    | South Africa | 10.0 | -                 | -   | -   | -   | -   | 2               |
| 405           | Fruit Ale              | Yes   | South Africa | nd   | -                 | -   | -   | -   | -   | -               |
| 406           | Fruit Ale              | Yes   | South Africa | nd   | -                 | -   | -   | -   | -   | -               |
| 408           | Fruit Ale              | Yes   | South Africa | nd   | -                 | -   | -   | -   | -   | 1               |
| 477           | Fruit / Vegetable Beer | No    | Netherlands  | 4.0  | -                 | -   | -   | 1   | -   | 14              |
| 503           | Spice/Herb/Vegetable   | Yes   | USA          | 8.0  | -                 | 3   | -   | 1   | 0.2 | -               |
| 552           | Fruit Ale              | No    | Belgium      | 4.3  | 0.2               | 7   | -   | 5   | -   | 17              |
| 582           | Herbed / Spiced Beer   | Yes   | USA          | 15.9 | 0.9               | 51  | -   | -   | -   | 5               |
| 613           | Fruit / Vegetable Beer | Yes   | USA          | 8.6  | 0.1               | 47  | -   | 1   | 0.3 | 2               |
| 630           | Spice/Herb/Vegetable   | No    | Poland       | 6.1  | -                 | 12  | -   | 1   | 0.4 | 3               |
| 710           | Herbed / Spiced Beer   | Yes   | Netherlands  | 7.5  | -                 | -   | -   | 3   | 0.2 | -               |
| 794           | Specialty Grain/herbed | Yes   | Netherlands  | 5.6  | -                 | 63  | -   | -   | 0.3 | 5               |
| 799           | Spice/Herb/Vegetable   | Yes   | Netherlands  | 7.0  | 2.7               | -   | -   | -   | -   | 1               |
| 814           | Traditional Ale        | Yes   | Scotland     | 5.0  | 0.1               | -   | -   | 1   | -   | 2               |
| 832           | Spice/Herb/Vegetable   | Yes   | Netherlands  | 9.0  | -                 | 4   | -   | 1   | 0.5 | 1               |
| 837           | Traditional Ale        | Yes   | Scotland     | 5.0  | -                 | -   | 0.1 | -   | 0.3 | -               |
| 856           | Belgian Strong Ale     | Yes   | Belgium      | 8.0  | -                 | -   | -   | -   | 0.1 | -               |
| 866           | Spice/Herb/Vegetable   | No    | Germany      | 4.5  | -                 | -   | -   | -   | -   | -               |
| 871           | Spice/Herb/Vegetable   | Yes   | Belgium      | 7.0  | -                 | -   | -   | -   | 0.1 | -               |
| 963           | spiced Belgian Ale     | Yes   | Belgium      | 5.5  | -                 | -   | -   | -   | 0.2 | -               |
| 982           | Spice/Herb/Vegetable   | Yes   | Spain        | 4.5  | -                 | -   | -   | -   | 0.2 | -               |
| 986           | Mead                   | Yes   | Netherlands  | 9.0  | -                 | -   | -   | -   | -   | -               |
| 987           | Fruit / Vegetable Beer | Yes   | Denmark      | 14.0 | -                 | -   | -   | -   | -   | -               |
| 989           | Spice/Herb/Vegetable   | Yes   | Sweden       | 5.9  | -                 | 2   | -   | -   | -   | -               |
| 997           | Spice/Herb/Vegetable   | Yes   | Netherlands  | 4.2  | -                 | -   | -   | -   | 0.2 | -               |

- = no mycotoxins detected

**S5 Table. H 6-plex immunoassay screening data imperial stout beers**

| Sample Number | Designated Style       | Craft | Country       | %ABV | Mycotoxins (µg/L) |     |     |     |     |                 |
|---------------|------------------------|-------|---------------|------|-------------------|-----|-----|-----|-----|-----------------|
|               |                        |       |               |      | AFB <sub>1</sub>  | DON | ZEN | T-2 | OTA | FB <sub>1</sub> |
| 10            | Russian Imperial Stout | Yes   | Netherlands   | 10.2 | -                 | 144 | -   | -   | 0.4 | 16              |
| 11            | Russian Imperial Stout | Yes   | Norway        | 15.5 | -                 | 140 | -   | -   | 0.3 | 16              |
| 20            | Russian Imperial Stout | Yes   | Belgium       | 13.0 | -                 | 135 | -   | -   | 0.3 | 15              |
| 32            | Russian Imperial Stout | Yes   | Netherlands   | 11.0 | -                 | 114 | -   | -   | 0.2 | 12              |
| 87            | Russian Imperial Stout | Yes   | United States | 11.0 | -                 | 150 | -   | -   | 0.5 | 50              |
| 88            | Russian Imperial Stout | Yes   | United States | 12.0 | -                 | 131 | -   | -   | 0.6 | 35              |
| 117           | Russian Imperial Stout | Yes   | Belgium       | 10.0 | -                 | 90  | -   | -   | 0.4 | 8               |
| 153           | Russian Imperial Stout | Yes   | United States | 9.5  | -                 | 140 | -   | -   | 0.4 | 42              |
| 173           | Imperial Stout         | Yes   | Belgium       | 13.0 | -                 | 118 | -   | -   | 0.4 | 17              |
| 181           | Imperial Stout         | Yes   | Netherlands   | 10.0 | -                 | 76  | -   | -   | 0.3 | 17              |
| 183           | Russian Imperial Stout | Yes   | United States | 15.0 | 2.2               | 475 | -   | 2   | 0.3 | 44              |
| 201           | Russian Imperial Stout | Yes   | United States | 11.0 | -                 | 52  | 0.3 | -   | 0.4 | 10              |
| 211           | Imperial Stout         | Yes   | United States | 9.5  | -                 | 149 | -   | -   | 0.4 | 14              |
| 247           | American Porter        | Yes   | United States | 8.2  | -                 | 29  | 0.4 | -   | 0.3 | 3               |
| 252           | Russian Imperial Stout | Yes   | United States | 13.0 | -                 | 114 | -   | -   | 0.2 | 4               |
| 259           | Russian Imperial Stout | Yes   | Norway        | 11.0 | -                 | 22  | -   | -   | -   | 2               |
| 292           | Russian Imperial Stout | Yes   | Denmark       | 10.4 | -                 | 21  | -   | -   | 0.3 | 29              |
| 306           | Imperial Stout         | Yes   | USA           | 11.0 | -                 | 142 | 0.1 | -   | 0.2 | 31              |
| 307           | Imperial Stout         | Yes   | Scotland      | 17.2 | -                 | 136 | -   | -   | -   | 36              |
| 317           | Imperial Stout         | Yes   | Norway        | 9.0  | -                 | 62  | 0.3 | 5   | 0.3 | 8               |
| 318           | Foreign Stout          | Yes   | Belgium       | 9.0  | -                 | 86  | -   | -   | 0.4 | 19              |
| 320           | Imperial Stout         | Yes   | Netherlands   | 11.4 | -                 | 111 | -   | -   | 0.2 | 16              |
| 329           | Imperial Stout         | Yes   | England       | 10.3 | -                 | 167 | -   | -   | 0.2 | 30              |
| 332           | Imperial Stout         | Yes   | Netherlands   | 13.0 | -                 | 140 | -   | -   | 0.2 | 26              |
| 344           | Imperial/Strong Porter | Yes   | Netherlands   | 11.0 | -                 | 78  | -   | -   | -   | 12              |
| 346           | Imperial/Strong Porter | Yes   | Denmark       | 8.3  | -                 | 22  | -   | 1   | 0.3 | 8               |
| 347           | Imperial/Strong Porter | Yes   | England       | 10.5 | -                 | 97  | -   | -   | -   | 20              |
| 352           | Imperial Stout         | Yes   | England       | 9.5  | -                 | 91  | -   | -   | 0.3 | 20              |
| 354           | Imperial Stout         | Yes   | Belgium       | 13.0 | -                 | 95  | -   | -   | 0.2 | 19              |
| 356           | Imperial Stout         | Yes   | Netherlands   | 11.0 | 1.5               | 45  | -   | 57  | 0.2 | 33              |
| 365           | Imperial Stout         | Yes   | Netherlands   | 10.0 | -                 | 58  | -   | -   | 0.2 | 12              |
| 367           | Imperial Stout         | Yes   | Denmark       | 10.5 | -                 | 136 | -   | -   | 0.1 | 20              |
| 370           | Imperial Porter        | Yes   | Netherlands   | 11.0 | -                 | 120 | -   | -   | -   | 12              |
| 376           | Imperial Stout         | Yes   | United States | 10.8 | -                 | 122 | -   | 2   | 0.4 | 16              |
| 389           | Imperial Stout         | Yes   | Netherlands   | 10.0 | -                 | 85  | -   | -   | 0.3 | 33              |
| 438           | Imperial/Strong Porter | Yes   | Netherlands   | 11.0 | 0.4               | 82  | -   | 3   | -   | 108             |
| 446           | Imperial Stout         | Yes   | United States | 8.2  | 0.8               | 46  | -   | 8   | -   | 123             |
| 468           | Imperial Stout         | Yes   | Canada        | 9.5  | 1.2               | 114 | -   | 6   | 0.4 | 63              |
| 501           | Imperial Stout         | Yes   | USA           | 8.8  | 1.9               | 95  | 0.1 | -   | 0.3 | 5               |
| 505           | Imperial Stout         | Yes   | Netherlands   | 10.7 | 1.2               | 47  | -   | -   | 0.3 | 1               |
| 569           | Imperial Stout         | Yes   | USA           | 12.5 | 1.1               | 65  | -   | -   | 0.3 | 31              |



| Sample number | Designated Style       | Craft | Country     | %ABV | Mycotoxins (µg/L) |     |     |     |     |                 |
|---------------|------------------------|-------|-------------|------|-------------------|-----|-----|-----|-----|-----------------|
|               |                        |       |             |      | AFB <sub>1</sub>  | DON | ZEN | T-2 | OTA | FB <sub>1</sub> |
| 576           | Imperial Stout         | Yes   | USA         | 9.6  | 2.0               | 39  | 0.8 | -   | 0.1 | 53              |
| 581           | Imperial Stout         | Yes   | USA         | 9.6  | 1.6               | 167 | -   | 1   | 0.1 | 54              |
| 585           | Imperial Stout         | Yes   | USA         | 13.0 | 1.1               | 89  | -   | -   | 0.1 | 64              |
| 587           | Imperial Stout         | Yes   | USA         | 19.5 | 1.2               | 36  | -   | -   | -   | 50              |
| 588           | Imperial Stout         | Yes   | USA         | 13.0 | 2.4               | 158 | -   | 2   | 0.4 | 76              |
| 589           | Imperial Stout         | Yes   | USA         | 9.6  | 1.7               | 85  | -   | 1   | 0.2 | 63              |
| 593           | Imperial Stout         | Yes   | USA         | 9.6  | 3.1               | 175 | -   | 1   | 0.2 | 48              |
| 594           | Imperial Stout         | Yes   | USA         | 13.0 | 2.7               | 134 | -   | 2   | 0.3 | 56              |
| 596           | Imperial Stout         | Yes   | USA         | 13.0 | 2.8               | 280 | -   | -   | 0.2 | 62              |
| 607           | Imperial Stout         | Yes   | Denmark     | 10.9 | -                 | 152 | -   | -   | -   | 39              |
| 612           | Imperial Stout         | Yes   | USA         | 9.0  | 1.3               | 89  | -   | 1   | 0.3 | 12              |
| 624           | Imperial Stout         | Yes   | Netherlands | 10.7 | 0.1               | 20  | -   | -   | -   | 3               |
| 625           | Imperial Stout         | Yes   | Netherlands | 10.0 | 1.1               | 21  | -   | -   | 1.0 | 4               |
| 626           | Imperial Stout         | Yes   | Belgium     | 11.0 | 0.4               | 54  | -   | -   | 0.1 | 8               |
| 631           | Imperial Stout         | Yes   | Norway      | 14.0 | -                 | 125 | -   | -   | -   | 10              |
| 638           | Imperial Stout         | Yes   | USA         | 10.6 | 1.4               | 58  | 0.4 | 7   | 0.2 | 24              |
| 644           | Imperial Stout         | Yes   | Netherlands | 11.0 | 0.6               | 21  | -   | -   | 0.1 | 9               |
| 654           | Imperial Stout         | Yes   | USA         | 10.2 | 1.0               | 6   | -   | 4   | 0.2 | 14              |
| 664           | Imperial Stout         | Yes   | Scotland    | 12.0 | -                 | 17  | -   | -   | -   | 2               |
| 666           | Imperial Stout         | Yes   | Netherlands | 12.5 | -                 | 15  | -   | 1   | 0.3 | 2               |
| 669           | Baltic Porter          | No    | Poland      | 9.0  | 0.5               | 44  | -   | 1   | 0.2 | 8               |
| 674           | Imperial Stout         | Yes   | USA         | 10.5 | 0.4               | 56  | -   | -   | -   | 9               |
| 676           | Baltic Porter          | Yes   | USA         | 9.0  | -                 | 20  | -   | -   | 0.1 | 6               |
| 678           | Imperial Stout         | Yes   | Denmark     | 13.0 | -                 | 34  | -   | -   | 0.2 | 9               |
| 687           | Imperial Stout         | Yes   | Denmark     | 10.1 | -                 | 34  | -   | -   | 0.1 | 9               |
| 692           | Imperial Stout         | Yes   | Belgium     | 12.0 | -                 | 18  | -   | -   | -   | 5               |
| 717           | Russian Imperial Stout | Yes   | USA         | 11.0 | 0.3               | 99  | -   | -   | 0.1 | 11              |
| 742           | Imperial Stout         | Yes   | Netherlands | 10.0 | 0.6               | 17  | -   | -   | 0.1 | 9               |
| 745           | Imperial Stout         | Yes   | Canada      | 9.5  | 2.0               | 56  | -   | 3   | 0.4 | 34              |
| 746           | Imperial Stout         | Yes   | Denmark     | 10.3 | 0.7               | 64  | -   | 1   | 0.4 | 27              |
| 748           | Imperial Stout         | Yes   | USA         | 11.0 | 1.5               | 101 | -   | -   | 0.1 | 32              |
| 751           | Imperial Stout         | Yes   | Denmark     | 10.0 | -                 | 79  | -   | 2   | 0.3 | 23              |
| 755           | Imperial Stout         | Yes   | Denmark     | 10.4 | -                 | 2   | -   | 2   | 0.3 | 11              |
| 761           | Stout                  | Yes   | Denmark     | 10.1 | -                 | 33  | -   | 4   | 0.4 | 18              |
| 764           | Imperial Stout         | Yes   | USA         | 11.0 | -                 | 21  | -   | -   | 0.2 | 8               |
| 765           | Imperial Stout         | Yes   | USA         | 8.3  | 2.1               | -   | -   | -   | -   | 3               |
| 766           | Foreign Stout          | Yes   | USA         | 8.8  | 2.3               | 14  | -   | -   | 0.3 | 10              |
| 767           | Imperial Stout         | Yes   | USA         | 8.0  | -                 | 2   | -   | -   | 0.3 | 7               |
| 770           | Russian Imperial Stout | Yes   | Denmark     | 10.3 | 2.2               | 31  | -   | -   | -   | 8               |
| 771           | Baltic Porter          | No    | Poland      | 8.0  | -                 | 21  | -   | -   | 0.3 | 4               |
| 778           | Imperial Stout         | Yes   | Denmark     | 12.0 | 1.4               | 82  | -   | -   | 0.2 | 21              |
| 780           | Imperial Stout         | Yes   | Canada      | 8.5  | 0.3               | 54  | -   | -   | 0.3 | 13              |

| Sample number | Designated Style        | Craft | Country     | %ABV | Mycotoxins (µg/L) |     |     |     |     |                 |
|---------------|-------------------------|-------|-------------|------|-------------------|-----|-----|-----|-----|-----------------|
|               |                         |       |             |      | AFB <sub>1</sub>  | DON | ZEN | T-2 | OTA | FB <sub>1</sub> |
| 781           | Imperial Stout          | Yes   | Netherlands | 11.0 | -                 | 32  | -   | -   | -   | 6               |
| 795           | Stout                   | Yes   | Netherlands | 9.0  | -                 | 98  | -   | -   | 0.7 | 8               |
| 816           | Russian Imperial Stout  | Yes   | Denmark     | 10.0 | -                 | -   | -   | -   | -   | -               |
| 818           | Russian Imperial Stout  | Yes   | USA         | 15.0 | -                 | -   | -   | -   | 0.3 | 4               |
| 820           | spiced Imperial Stout   | Yes   | USA         | 11.0 | -                 | -   | -   | -   | 0.2 | 11              |
| 822           | spiced Imperial Stout   | Yes   | USA         | 11.0 | -                 | 102 | -   | -   | -   | 12              |
| 823           | spiced Imperial Stout   | Yes   | USA         | 11.0 | -                 | 168 | -   | -   | -   | 9               |
| 824           | spiced Imperial Stout   | Yes   | USA         | 11.0 | -                 | 129 | -   | -   | 0.3 | 20              |
| 825           | Russian Imperial Stout  | Yes   | England     | 15.0 | -                 | 13  | -   | 2   | 0.3 | 9               |
| 830           | Imperial Stout          | Yes   | USA         | 11.1 | -                 | -   | -   | 1   | 0.5 | 14              |
| 843           | Imperial Stout          | Yes   | Netherlands | 9.0  | -                 | 33  | 0.1 | -   | 0.5 | 4               |
| 848           | Imperial/ Strong Porter | Yes   | USA         | 11.0 | -                 | 16  | -   | -   | 0.5 | 1               |
| 853           | Americal Double         | Yes   | USA         | 9.5  | -                 | 32  | -   | -   | 0.3 | 2               |
| 854           | Imperial Stout          | Yes   | Netherlands | 14.0 | -                 | 8   | -   | -   | 0.4 | 1               |
| 865           | Imperial Stout          | Yes   | USA         | 9.5  | -                 | 29  | -   | -   | 0.1 | -               |
| 867           | Imperial Strong Porter  | Yes   | USA         | 11.0 | -                 | 74  | -   | -   | -   | 1               |
| 876           | Imperial Stout          | Yes   | USA         | 19.5 | -                 | -   | -   | -   | 0.1 | -               |
| 882           | Baltic Porter           | No    | Poland      | 9.0  | -                 | 42  | -   | -   | 0.4 | 22              |
| 889           | Imperial Stout          | Yes   | Netherlands | 9.8  | -                 | 25  | -   | -   | -   | -               |
| 892           | Imperial Stout          | Yes   | Netherlands | 11.0 | 0.5               | 62  | -   | -   | 0.4 | 5               |
| 893           | Stout                   | Yes   | Netherlands | 9.5  | -                 | 41  | -   | -   | 0.3 | 3               |
| 897           | Imperial Porter         | Yes   | USA         | 9.2  | 0.2               | 90  | -   | -   | 0.4 | 2               |
| 900           | Imperial Stout          | Yes   | Nederland   | 11.0 | -                 | 154 | -   | -   | 0.3 | 2               |
| 911           | Russian Imperial Stout  | Yes   | USA         | 9.4  | 0.6               | 177 | 0.9 | 3   | -   | 22              |
| 919           | Imperial Stout          | Yes   | Canada      | 8.0  | 2.2               | -   | -   | 2   | -   | 16              |
| 955           | Imperial Stout          | Yes   | Netherlands | 12.6 | -                 | 5   | -   | -   | -   | -               |
| 964           | Imperial Stout          | Yes   | USA         | 13.9 | -                 | 24  | -   | -   | -   | -               |
| 965           | Imperial Stout          | Yes   | USA         | 10.5 | -                 | 30  | -   | -   | 0.3 | 3               |
| 969           | Imperial Stout          | Yes   | Belgium     | 10.0 | -                 | 2   | -   | -   | -   | -               |
| 971           | Imperial Stout          | Yes   | USA         | 9.5  | -                 | 1   | -   | -   | -   | 1               |
| 978           | Imperial Stout          | Yes   | Denmark     | 10.0 | -                 | 144 | -   | 13  | 0.3 | 43              |
| 980           | Imperial Stout          | Yes   | Belgium     | 10.0 | -                 | -   | -   | -   | -   | -               |
| 988           | Imperial Stout          | Yes   | Denmark     | 17.5 | -                 | -   | -   | -   | -   | -               |
| 990           | Imperial Stout          | Yes   | Netherlands | 9.8  | -                 | -   | -   | -   | 0.2 | -               |
| 992           | Imperial Stout          | Yes   | Denmark     | 12.1 | -                 | -   | -   | -   | -   | -               |
| 993           | Imperial Stout          | Yes   | Sweden      | 10.0 | -                 | -   | -   | -   | 0.2 | -               |
| 996           | Stout                   | Yes   | Italy       | 12.0 | -                 | -   | -   | -   | -   | -               |
| 1000          | Imperial Stout          | Yes   | USA         | 12.7 | -                 | -   | -   | -   | 0.3 | -               |
| 1010          | Stout                   | Yes   | Netherlands | 8.0  | -                 | 67  | -   | -   | -   | -               |
| 1013          | Imperial Stout          | Yes   | England     | 10.0 | -                 | 5   | -   | -   | 0.3 | -               |
| 1034          | Imperial Stout          | Yes   | USA         | 12.0 | -                 | 220 | -   | -   | 0.1 | 16              |
| 1039          | Imperial Stout          | Yes   | Netherlands | 10.8 | -                 | 74  | -   | -   | 0.1 | -               |

| Sample number | Designated Style | Craft | Country | %ABV | Mycotoxins (µg/L) |     |     |     |     |                 |
|---------------|------------------|-------|---------|------|-------------------|-----|-----|-----|-----|-----------------|
|               |                  |       |         |      | AFB <sub>1</sub>  | DON | ZEN | T-2 | OTA | FB <sub>1</sub> |
| 1047          | Imperial Stout   | Yes   | USA     | 12.0 | -                 | 82  | -   | -   | 0.1 | -               |

- = no mycotoxins detected

**S5 Table. I 6-plex immunoassay screening data India pale ale beers**

| Sample Number | Designated Style              | Craft | Country       | %ABV | Mycotoxins (µg/L) |     |     |     |     |                 |
|---------------|-------------------------------|-------|---------------|------|-------------------|-----|-----|-----|-----|-----------------|
|               |                               |       |               |      | AFB <sub>1</sub>  | DON | ZEN | T-2 | OTA | FB <sub>1</sub> |
| 4             | Extra Special / Strong Bitter | No    | England       | 5.4  | -                 | 9   | -   | -   | 0.3 | -               |
| 21            | India Pale Ale                | Yes   | Netherlands   | 6.2  | -                 | 32  | -   | -   | 0.5 | 12              |
| 62            | India Pale Ale                | Yes   | United States | 7.1  | 0.8               | 16  | -   | -   | 0.3 | 13              |
| 89            | India Pale Ale                | Yes   | United States | 7.0  | -                 | 4   | -   | -   | 0.5 | 4               |
| 112           | India Pale Ale                | Yes   | Netherlands   | 7.0  | -                 | 21  | -   | -   | 0.4 | 4               |
| 145           | IPA                           | No    | Belgium       | 7.5  | -                 | 7   | -   | -   | 0.6 | 3               |
| 148           | India Pale Ale                | No    | England       | 5.3  | -                 | -   | 0.4 | -   | 0.4 | -               |
| 151           | India Pale Ale                | Yes   | Denmark       | 6.9  | -                 | 109 | -   | -   | 0.4 | 24              |
| 177           | India Pale Ale                | Yes   | Belgium       | 7.0  | -                 | 146 | -   | -   | 0.4 | 6               |
| 192           | Bitter                        | No    | England       | 3.8  | -                 | 28  | -   | -   | 0.4 | -               |
| 240           | Black IPA                     | Yes   | Netherlands   | 7.2  | -                 | 20  | -   | -   | 0.3 | 2               |
| 293           | Bitter                        | Yes   | Netherlands   | 4.5  | -                 | 26  | 0.6 | -   | 0.3 | 5               |
| 294           | India Pale Ale                | Yes   | England       | 5.0  | -                 | 14  | 1.5 | -   | 0.3 | 1               |
| 300           | India Pale Ale                | Yes   | England       | 6.0  | -                 | -   | -   | 6   | 0.3 | 2               |
| 372           | Bitter                        | Yes   | Sweden        | 5.7  | -                 | 69  | -   | 3   | 0.4 | 11              |
| 375           | Bitter                        | Yes   | England       | 3.9  | -                 | 8   | 0.2 | 1   | 0.3 | 5               |
| 385           | India Pale Ale                | Yes   | England       | 5.9  | -                 | 7   | -   | 1   | -   | 4               |
| 449           | India Pale Ale                | Yes   | United States | 7.5  | 0.6               | 5   | -   | 2   | -   | -               |
| 479           | India Pale Ale                | Yes   | Belgium       | 7.0  | 0.4               | 84  | -   | -   | -   | -               |
| 482           | Belgian Strong Ale            | Yes   | Netherlands   | 6.7  | 1.4               | 11  | -   | -   | -   | 6               |
| 504           | Bitter                        | Yes   | USA           | 5.6  | 0.4               | -   | -   | -   | -   | -               |
| 534           | India Pale Ale                | Yes   | Netherlands   | 4.5  | 0.5               | -   | 0.8 | 5   | 0.4 | 22              |
| 565           | Bitter                        | Yes   | Netherlands   | 4.5  | 0.3               | 8   | -   | 1   | 0.3 | 10              |
| 571           | Black IPA                     | Yes   | USA           | 6.9  | 1.1               | 42  | -   | 1   | 0.3 | 67              |
| 618           | India Pale Ale                | Yes   | France        | 7.0  | -                 | 17  | 0.1 | 2   | 0.2 | 1               |
| 683           | India Pale Ale                | Yes   | USA           | 6.9  | -                 | -   | -   | -   | 0.3 | 1               |
| 719           | India Pale Ale                | Yes   | Denmark       | 6.8  | -                 | -   | 1.7 | 6   | 0.3 | 1               |
| 732           | Bitter ESB                    | Yes   | Denmark       | 4.8  | -                 | -   | -   | 10  | 0.4 | 1               |
| 762           | India Pale Ale                | Yes   | Japan         | 7.5  | -                 | -   | -   | 2   | 0.3 | 3               |
| 772           | India Pale Ale                | Yes   | France        | 7.0  | -                 | -   | -   | -   | 0.3 | -               |
| 789           | India Pale Ale                | Yes   | Netherlands   | 6.6  | -                 | 69  | -   | -   | 0.6 | 5               |
| 796           | Bitter                        | No    | England       | 3.5  | -                 | -   | -   | 1   | -   | 0               |
| 800           | Bitter                        | Yes   | Netherlands   | 4.5  | 2.6               | -   | -   | -   | -   | 7               |
| 845           | India Pale Ale                | Yes   | Netherlands   | 7.0  | -                 | -   | 0.1 | -   | 0.5 | -               |
| 850           | India Pale Ale                | Yes   | Netherlands   | 6.2  | -                 | -   | -   | -   | 0.3 | -               |
| 860           | IPA                           | Yes   | Germany       | 5.1  | -                 | -   | -   | -   | -   | -               |
| 869           | India Pale Ale                | Yes   | Germany       | 6.1  | -                 | -   | -   | -   | -   | -               |
| 883           | India Pale Ale                | Yes   | Netherlands   | 6.0  | -                 | -   | -   | -   | 0.3 | -               |
| 906           | IPA                           | Yes   | Germany       | 4.9  | 1.6               | -   | -   | -   | 0.2 | 5               |
| 922           | India Pale Ale                | Yes   | Nederland     | 6.8  | 2.6               | -   | -   | 2   | -   | 2               |
| 950           | India Pale Ale                | Yes   | Poland        | 6.2  | -                 | 9   | -   | -   | -   | -               |

| Sample number | Designated Style | Craft | Country | %ABV | Mycotoxins (µg/L) |     |     |     |     |                 |
|---------------|------------------|-------|---------|------|-------------------|-----|-----|-----|-----|-----------------|
|               |                  |       |         |      | AFB <sub>1</sub>  | DON | ZEN | T-2 | OTA | FB <sub>1</sub> |
| 952           | White IPA        | Yes   | Poland  | 5.6  | -                 | 6   | -   | -   | 0.3 | -               |
| 991           | India Pale Ale   | Yes   | Spain   | 5.4  | -                 | -   | -   | -   | 0.2 | -               |

- = no mycotoxins detected

**S5 Table. J 6-plex immunoassay screening data non/low alcohol beers**

| Sample Number | Designated Style | Craft | Country        | %ABV | Mycotoxins (µg/L) |     |     |     |     |                 |
|---------------|------------------|-------|----------------|------|-------------------|-----|-----|-----|-----|-----------------|
|               |                  |       |                |      | AFB <sub>1</sub>  | DON | ZEN | T-2 | OTA | FB <sub>1</sub> |
| 47            | Non - Alcoholic  | No    | Netherlands    | 0.0  | -                 | -   | -   | -   | 0.4 |                 |
| 52            | Non - Alcoholic  | Yes   | Germany        | 0.0  | -                 | 11  | -   | -   | 0.3 |                 |
| 61            | Non - Alcoholic  | No    | Netherlands    | 0.0  | -                 | -   | 0.1 | -   | 0.7 |                 |
| 65            | Non - Alcoholic  | No    | Germany        | 0.0  | -                 | -   | -   | -   | 0.3 |                 |
| 67            | Non - Alcoholic  | No    | Belgium        | 0.0  | -                 | -   | -   | -   | 0.3 | 1               |
| 68            | Non - Alcoholic  | No    | Germany        | 0.0  | -                 | -   | -   | -   | 0.3 | 1               |
| 72            | Non - Alcoholic  | No    | Belgium        | 0.5  | -                 | -   | 0.4 | -   | 0.3 |                 |
| 85            | Non - Alcoholic  | No    | Germany        | 0.4  | -                 | 5   | 0.2 | 1   | 0.5 | 3               |
| 121           | Non - Alcoholic  | No    | Czech Republic | 0.0  | -                 | 36  | 0.5 | 4   | 0.2 | 3               |
| 122           | Non - Alcoholic  | No    | Czech Republic | 0.0  | -                 | 4   | 0.4 | -   | 0.5 | 3               |
| 158           | Non - Alcoholic  | No    | Netherlands    | 0.0  | -                 | -   | 0.6 | 2   | 0.3 | -               |
| 234           | Non - Alcoholic  | No    | Germany        | 0.0  | -                 | -   | -   | -   | 0.3 | -               |
| 235           | Non - Alcoholic  | No    | Germany        | 0.0  | -                 | -   | -   | -   | 0.3 | -               |
| 237           | Non - Alcoholic  | No    | Germany        | 0.5  | -                 | 14  | -   | -   | 0.3 | -               |
| 243           | Non - Alcoholic  | No    | Germany        | 0.0  | -                 | -   | -   | -   | 0.3 | -               |
| 244           | Non - Alcoholic  | No    | Germany        | 0.5  | -                 | -   | 0.2 | -   | 0.2 | -               |
| 248           | Non - Alcoholic  | No    | Germany        | 0.3  | -                 | -   | 0.1 | 6   | 0.3 | 1               |
| 253           | Non - Alcoholic  | No    | Germany        | 0.0  | -                 | -   | -   | -   | 0.4 | -               |
| 255           | Non - Alcoholic  | No    | Germany        | 0.0  | -                 | -   | -   | -   | 0.3 | -               |
| 257           | Non - Alcoholic  | No    | Germany        | 0.0  | -                 | -   | -   | -   | 0.3 | -               |
| 258           | Non - Alcoholic  | No    | Germany        | 0.0  | -                 | -   | -   | -   | 0.3 | -               |
| 283           | Low Alcohol      | No    | Namibia        | 2.4  | -                 | -   | -   | 3   | 0.3 | -               |
| 302           | Non - Alcoholic  | No    | Netherlands    | 0.0  | -                 | -   | -   | 6   | 0.3 | 5               |
| 308           | Non - Alcoholic  | No    | Germany        | 0.1  | -                 | -   | -   | 6   | 0.3 | 8               |
| 393           | Low-Alcoholic    | No    | Spain          | 2.4  | -                 | -   | -   | 3   | 0.3 | 30              |
| 394           | Non - Alcoholic  | No    | Spain          | 0.0  | -                 | -   | -   | 3   | 0.3 | 26              |
| 395           | Non - Alcoholic  | No    | Spain          | 0.0  | -                 | -   | -   | -   | -   | 28              |
| 398           | Non - Alcoholic  | No    | Spain          | 0.0  | -                 | -   | -   | -   | 0.3 | 34              |
| 466           | Non - Alcoholic  | No    | Germany        | 0.0  | -                 | -   | 0.4 | 14  | 0.2 | 20              |
| 500           | Non - Alcoholic  | No    | Italy          | 0.1  | -                 | -   | -   | 2   | 0.1 | -               |
| 675           | Low Alcohol      | Yes   | Belgium        | 2.0  | -                 | 4   | -   | 2   | 0.3 | 6               |
| 686           | Low Alcohol      | Yes   | Denmark        | 0.6  | -                 | 33  | -   | 3   | 0.2 | 2               |
| 931           | Low Alcohol      | No    | Spain          | 1.0  | -                 | -   | -   | 6   | 0.2 | 5               |
| 937           | Low Alcohol      | No    | Spain          | 0.8  | -                 | -   | 5.7 | 5   | 0.2 | 10              |
| 940           | Pale Ale         | No    | Spain          | 0.0  | -                 | -   | -   | -   | 0.3 | -               |
| 944           | Low Alcohol      | No    | Spain          | 0.0  | -                 | -   | -   | -   | -   | 11              |

- = no mycotoxins detected

**S5 Table. K 6-plex immunoassay screening data pale ale beers**

| Sample Number | Designated Style    | Craft | Country       | %ABV | Mycotoxins (µg/L) |     |     |     |     |                 |
|---------------|---------------------|-------|---------------|------|-------------------|-----|-----|-----|-----|-----------------|
|               |                     |       |               |      | AFB <sub>1</sub>  | DON | ZEN | T-2 | OTA | FB <sub>1</sub> |
| 3             | Belgian Pale Ale    | No    | Belgium       | 4.5  | -                 | -   | -   | -   | 0.3 | 6               |
| 8             | Belgian Pale Ale    | Yes   | Netherlands   | 4.7  | -                 | -   | -   | 1   | 0.4 | 8               |
| 23            | Pilsner             | Yes   | Netherlands   | 4.7  | -                 | 4   | -   | -   | 0.3 | -               |
| 35            | Belgian Ale         | Yes   | Netherlands   | 7.5  | -                 | 51  | -   | -   | 0.2 | -               |
| 50            | Abbey Tripel        | Yes   | Netherlands   | 8.0  | -                 | -   | -   | -   | 0.1 | -               |
| 51            | Abbey Tripel        | Yes   | Belgium       | 8.0  | -                 | 7   | -   | -   | 0.3 | -               |
| 54            | Abbey Tripel        | Yes   | Belgium       | 8.0  | 1.2               | 4   | -   | 5   | -   | -               |
| 59            | Belgian Ale         | Yes   | Netherlands   | 4.5  | -                 | -   | -   | -   | -   | -               |
| 75            | Abbey Tripel        | Yes   | Netherlands   | 8.0  | -                 | 10  | -   | -   | 0.2 | -               |
| 78            | Blond               | Yes   | Netherlands   | 6.0  | -                 | -   | -   | -   | 0.3 | -               |
| 79            | Blond               | No    | Belgium       | 8.0  | -                 | -   | -   | -   | 0.3 | -               |
| 81            | Ale                 | Yes   | England       | 5.0  | -                 | -   | -   | -   | 0.1 | 2               |
| 94            | Belgian Pale Ale    | No    | Belgium       | 5.4  | -                 | 12  | -   | -   | 0.3 | -               |
| 97            | Belgian Ale         | Yes   | Netherlands   | 5.5  | 0.7               | 92  | -   | 1   | 0.2 | 22              |
| 114           | Belgian Ale         | Yes   | Netherlands   | 6.5  | -                 | 35  | -   | -   | 0.3 | 8               |
| 115           | English Pale Ale    | No    | England       | 4.7  | -                 | 5   | -   | -   | 0.5 | 4               |
| 142           | Irish red Ale       | No    | Ireland       | 5.0  | -                 | -   | 0.7 | 2   | 0.3 | 5               |
| 162           | Abbey Tripel        | No    | Belgium       | 7.8  | -                 | 26  | -   | -   | 0.3 | -               |
| 166           | Belgian Ale         | No    | Belgium       | 7.0  | -                 | -   | -   | -   | 0.3 | -               |
| 176           | Belgian Ale         | Yes   | France        | 6.5  | 1.4               | -   | -   | 1   | 0.3 | -               |
| 179           | Pale Ale            | No    | Germany       | 5.6  | -                 | 14  | -   | -   | 0.5 | 3               |
| 180           | Pale Ale            | Yes   | England       | 5.0  | -                 | -   | -   | -   | 0.4 | 3               |
| 186           | Belgian Pale Ale    | Yes   | Belgium       | 5.8  | -                 | -   | -   | -   | 0.2 | 1               |
| 194           | American Strong Ale | Yes   | United States | 7.2  | -                 | 147 | -   | -   | -   | 2               |
| 197           | Belgian Ale         | Yes   | Netherlands   | 5.5  | -                 | 38  | 0.3 | -   | 0.4 | -               |
| 217           | Pale Ale            | No    | Poland        | 5.7  | -                 | 26  | -   | -   | -   | 7               |
| 226           | Pale Ale            | No    | France        | 5.8  | -                 | -   | -   | -   | 3.1 | -               |
| 232           | Abbey Tripel        | Yes   | Netherlands   | 8.0  | -                 | 36  | -   | -   | 0.2 | -               |
| 251           | Belgian Pale Ale    | Yes   | Belgium       | 6.3  | -                 | -   | -   | -   | -   | -               |
| 299           | Irish Red Ale       | No    | Ireland       | 4.3  | -                 | -   | 1.8 | 2   | 0.3 | 2               |
| 304           | Pale Ale            | No    | Finland       | 5.2  | -                 | -   | -   | 1   | 0.2 | -               |
| 312           | American Pale Ale   | Yes   | Norway        | 4.5  | -                 | 30  | -   | 3   | 0.3 | 11              |
| 345           | Belgian Ale         | Yes   | Belgium       | 6.2  | -                 | -   | -   | -   | -   | -               |
| 349           | Belgian Ale         | Yes   | Denmark       | 8.7  | -                 | 10  | -   | 35  | 0.4 | 9               |
| 373           | Pale Ale            | Yes   | Sweden        | 4.9  | -                 | 51  | -   | 4   | 0.4 | 10              |
| 374           | Weizen Bock         | Yes   | Netherlands   | 6.9  | -                 | 6   | -   | 4   | 0.1 | 1               |
| 378           | Blond Ale           | Yes   | Belgium       | 8.0  | -                 | 8   | -   | -   | -   | 3               |
| 379           | Pale Ale            | Yes   | England       | 5.2  | -                 | 56  | 0.2 | 1   | 0.3 | 13              |
| 380           | Belgian Ale         | Yes   | Norway        | 6.0  | -                 | 8   | -   | 7   | 0.4 | 2               |
| 432           | Belgian Strong Ale  | No    | Belgium       | 8.5  | -                 | 5   | -   | 6   | -   | 19              |
| 437           | Abbey Tripel        | Yes   | Belgium       | 8.0  | 0.6               | -   | -   | 4   | 0.1 | -               |

| Sample number | Designated Style    | Craft | Country       | %ABV | Mycotoxins (µg/L) |     |     |     |     |                 |
|---------------|---------------------|-------|---------------|------|-------------------|-----|-----|-----|-----|-----------------|
|               |                     |       |               |      | AFB <sub>1</sub>  | DON | ZEN | T-2 | OTA | FB <sub>1</sub> |
| 440           | Abbey Tripel        | Yes   | Belgium       | 8.0  | -                 | 1   | -   | 5   | -   | -               |
| 443           | Belgian Strong Ale  | Yes   | United States | 7.8  | -                 | -   | -   | 5   | -   | 23              |
| 457           | Belgian Ale         | No    | Netherlands   | 6.2  | -                 | -   | 0.4 | 5   | -   | 3               |
| 490           | Belgian Ale         | Yes   | Belgium       | 7.6  | -                 | 24  |     |     | 0.2 | 16              |
| 511           | Belgian Ale         | Yes   | Belgium       | 7.0  | -                 | -   |     | -   | -   | -               |
| 530           | Blond               | No    | Netherlands   | 6.0  | -                 | -   | 1.4 | 7   | 0.3 | 22              |
| 537           | Belgian Pale Ale    | No    | Belgium       | 6.0  | -                 | -   | 0.5 | 7   | 0.1 | 14              |
| 556           | Blond               | No    | Netherlands   | 6.2  | -                 | 1   | -   | 4   | 0.1 | 4               |
| 559           | Blond               | No    | Belgium       | 7.5  | 0.4               | 4   | 0.1 | 4   | 0.2 | 7               |
| 564           | Blond               | No    | Belgium       | 6.6  | -                 | 4   | -   | 1   | 0.2 | 11              |
| 573           | Belgian Ale         | Yes   | Belgium       | 4.8  | 0.5               | 30  | -   | 4   | 0.2 | 16              |
| 574           | English Strong Ale  | No    | England       | 6.3  | 0.9               | 11  | 0.7 | -   | 0.2 | -               |
| 583           | Belgian Ale         | Yes   | Belgium       | 9.0  | 1.8               | 83  |     | 1   | 0.2 | 93              |
| 590           | Abbey Tripel        | Yes   | Belgium       | 8.0  | -                 | 11  | -   | 1   |     | 11              |
| 598           | Blond               | Yes   | Belgium       | 5.5  | -                 | 8   | -   | 5   | 0.1 | 1               |
| 604           | Pale Ale            | No    | Belgium       | 7.0  | -                 | -   | -   | 3   | -   | -               |
| 605           | Kölsch              | No    | Germany       | 4.8  | 2.1               | 22  | -   | 5   | 0.6 | 9               |
| 616           | English Strong Ale  | No    | England       | 8.5  | -                 | 20  | -   | -   | 0.2 | 2               |
| 628           | Specialty Grain     | No    | Belgium       | 8.2  | -                 | 44  | -   | 1   | 0.1 | -               |
| 648           | Abbey Tripel        | Yes   | Belgium       | 8.0  | -                 | 12  | -   | 6   | -   | 10              |
| 649           | American Strong Ale | Yes   | USA           | 7.0  | -                 | 4   | -   | 2   | -   | 10              |
| 651           | Belgian Ale         | Yes   | Italy         | 5.5  | -                 | -   | -   | 7   | 0.1 | 11              |
| 652           | Belgian Ale         | Yes   | Italy         | 6.5  | -                 | -   | -   | 8   | 0.2 | 10              |
| 656           | Belgium Ale         | Yes   | Belgium       | 5.0  | 0.3               | -   | -   | 8   | 0.1 | 12              |
| 657           | Amber Ale           | Yes   | Netherlands   | 5.0  | -                 | 2   | -   | 5   | 0.4 | 4               |
| 663           | English Strong Ale  | No    | Scotland      | 7.2  | -                 | -   | -   | 4   | 0.3 | 1               |
| 667           | Pale Ale            | Yes   | France        | 8.0  | -                 | -   | -   | 1   | 0.0 |                 |
| 671           | Belgian Ale         | No    | Belgium       | 4.5  | 0.4               | 3   | -   | 3   | 0.4 | 1               |
| 695           | Amber Ale           | Yes   | Netherlands   | 6.4  | -                 | 3   | -   | 5   | 0.4 | 2               |
| 700           | Belgium Ale         | No    | Belgium       | 7.0  | -                 | -   | -   | -   | 0.2 | -               |
| 716           | Belgium Strong Ale  | No    | Belgium       | 8.0  | -                 | -   | -   | -   | 0.2 | -               |
| 720           | Belgian Triple      | Yes   | Denmark       | 8.5  | -                 | -   | 0.3 | 5   | 0.3 | 1               |
| 733           | American Pale Ale   | Yes   | Denmark       | 5.0  | -                 | -   | 0.9 | 10  | 0.3 |                 |
| 756           | Belgian Ale         | Yes   | Belgium       | 6.0  | -                 | -   |     | 3   | 0.2 |                 |
| 786           | Amber Ale           | No    | Netherlands   | 5.3  | -                 | 46  | 0.3 | 1   | 1.1 | 14              |
| 788           | Pale Ale            | No    | Belgium       | 5.0  | -                 | 28  | 0.7 | -   | 2.0 |                 |
| 791           | Strong Pale Ale     | No    | England       | 6.5  | -                 | 58  | 0.4 | -   | 1.7 | 3               |
| 793           | Pale Ale            | Yes   | Netherlands   | 5.6  | -                 | 61  | 0.6 | -   | 0.6 | 5               |
| 797           | Traditional Ale     | Yes   | Netherlands   | 6.0  | -                 | -   | -   | 3   | -   | 0               |
| 798           | Belgian Ale         | Yes   | Netherlands   | 7.4  | 2.7               | -   | -   | 7   | -   | 5               |
| 801           | Belgian Ale         | Yes   | Netherlands   | 6.0  | -                 | -   | -   | 4   | -   | 13              |
| 810           | Belgian Ale         | Yes   | Norway        | 6.0  | -                 | 16  | -   | -   | -   | -               |
| 811           | Belgian Ale         | Yes   | Netherlands   | 7.2  | -                 | -   | -   | -   | -   | -               |



| Sample number | Designated Style  | Craft | Country     | %ABV | Mycotoxins (µg/L) |     |     |     |     |                 |
|---------------|-------------------|-------|-------------|------|-------------------|-----|-----|-----|-----|-----------------|
|               |                   |       |             |      | AFB <sub>1</sub>  | DON | ZEN | T-2 | OTA | FB <sub>1</sub> |
| 862           | Rye               | Yes   | Netherlands | 5.3  | -                 | -   | -   | -   | 0.1 | -               |
| 884           | Belgian Ale       | Yes   | Belgium     | 5.0  | 0.3               | 34  | 0.6 | 8   | 0.6 | 5               |
| 894           | Belgian Pale Ale  | No    | Belgium     | 6.0  | -                 | -   | -   | -   | 0.2 | -               |
| 905           | Pale Ale          | Yes   | Belgium     | 7.6  | 2.2               | -   | -   | -   | -   | 1               |
| 913           | Belgian Ale       | Yes   | Belgium     | 6.2  | 2.2               | -   | 0.6 | 2   | 0.1 | -               |
| 958           | Belgian Ale       | Yes   | Nederland   | 5.6  | -                 | -   | -   | -   | 0.2 | -               |
| 959           | Specialty Grain   | Yes   | Belgium     | 8.5  | -                 | -   | -   | -   | -   | -               |
| 981           | Pale Ale          | Yes   | Scotland    | 3.8  | -                 | 7   | -   | -   | 0.2 | -               |
| 1009          | American Pale Ale | Yes   | Denmark     | 6.0  | -                 | 6   | -   | -   | 0.3 | -               |
| 1030          | English Pale Ale  | No    | Spain       | 4.8  | -                 | -   | -   | -   | 0.1 | -               |
| 1036          | Belgian Pale Ale  | Yes   | Belgium     | 4.5  | -                 | 13  | -   | -   | -   | -               |

- = no mycotoxins detected

**S5 Table. L** 6-plex immunoassay screening data pale lager beers

| Sample Number | Designated Style      | Craft | Country        | %ABV | Mycotoxins (µg/L) |     |     |     |     |                 |
|---------------|-----------------------|-------|----------------|------|-------------------|-----|-----|-----|-----|-----------------|
|               |                       |       |                |      | AFB <sub>1</sub>  | DON | ZEN | T-2 | OTA | FB <sub>1</sub> |
| 6             | Adjunct Lager         | No    | Mexico         | 4.6  | -                 | -   | -   | -   | 0.3 | -               |
| 7             | Pilsner               | No    | Germany        | 6.5  | -                 | 9   | -   | -   | 0.2 | -               |
| 12            | Pale Lager            | No    | Spain          | 5.2  | -                 | -   | -   | -   | 0.4 | 15              |
| 24            | Pilsner               | No    | Germany        | 4.9  | -                 | 4   | -   | -   | 0.4 | 1               |
| 31            | Helles Lager          | No    | Germany        | 4.9  | -                 | 4   | -   | -   | 0.3 | -               |
| 39            | Adjunct Lager         | No    | Mexico         | 4.6  | -                 | -   | -   | -   | 0.4 | -               |
| 40            | Pale Lager            | No    | Netherlands    | 5.0  | -                 | -   | -   | -   | 0.4 | -               |
| 42            | Premium Lager         | No    | China          | 4.5  | -                 | -   | -   | -   | 0.4 | -               |
| 43            | Pilsner               | Yes   | Netherlands    | 5.0  | -                 | -   | -   | -   | 0.3 | -               |
| 44            | Pilsner               | No    | Netherlands    | 5.0  | -                 | -   | -   | -   | 0.2 | -               |
| 45            | Pilsner               | No    | Turkey         | 5.0  | -                 | -   | -   | -   | 0.4 | -               |
| 46            | Pilsner               | No    | Netherlands    | 5.3  | -                 | -   | -   | -   | 0.3 | -               |
| 48            | Specialty/Gluten Free | No    | Germany        | 5.0  | -                 | 4   | -   | 3   | -   | 20              |
| 55            | Helles Lager          | No    | Germany        | 5.2  | -                 | 17  | -   | 1   | -   | 15              |
| 64            | Pilsner               | No    | Netherlands    | 5.0  | -                 | -   | -   | -   | -   | -               |
| 66            | Pilsner               | No    | Belgium        | 5.2  | -                 | -   | -   | -   | 0.2 | -               |
| 70            | Pilsner               | No    | Czech Republic | 4.4  | -                 | 42  | -   | -   | 0.3 | 1               |
| 71            | Pilsner               | No    | Germany        | 5.1  | -                 | -   | -   | -   | 0.3 | -               |
| 73            | Pilsner               | No    | Czech Republic | 5.0  | -                 | 14  | 0.1 | -   | 0.2 | -               |
| 83            | Pilsner               | No    | Netherlands    | 5.0  | -                 | -   | -   | 1   | 0.4 | -               |
| 91            | Pale Lager            | No    | Spain          | 5.4  | -                 | -   | -   | -   | -   | -               |
| 93            | Pilsner               | No    | Germany        | 4.9  | -                 | 12  | -   | -   | 0.5 | 4               |
| 96            | Adjunct Lager         | No    | United States  | 5.0  | -                 | -   | -   | -   | 0.4 | -               |
| 103           | Pilsner               | No    | Netherlands    | 5.0  | -                 | -   | -   | -   | 0.4 | -               |
| 105           | Pilsner               | No    | Netherlands    | 5.0  | -                 | -   | -   | -   | 0.3 | -               |
| 106           | Pilsner               | No    | Belgium        | 5.0  | -                 | -   | -   | -   | 0.4 | -               |
| 107           | Pilsner               | No    | Germany        | 5.0  | -                 | -   | -   | -   | 0.3 | -               |
| 108           | Pilsner               | No    | Netherlands    | 5.0  | -                 | -   | -   | -   | 0.5 | 7               |
| 109           | Pilsner               | No    | Netherlands    | 5.0  | -                 | -   | -   | 1   | 0.5 | 6               |
| 110           | Pilsner               | No    | Germany        | 4.9  | -                 | -   | -   | -   | 0.5 | 5               |
| 111           | Pilsner               | No    | Greece         | 5.0  | -                 | 10  | -   | -   | 0.4 | 4               |
| 118           | Pilsner               | No    | Netherlands    | 5.0  | -                 | -   | 0.6 | -   | 0.5 | -               |
| 120           | Pilsner               | No    | Netherlands    | 5.0  | -                 | -   | -   | -   | 0.4 | -               |
| 125           | Pale Lager            | No    | Czech Republic | 4.0  | -                 | 20  | 0.4 | 7   | 0.3 | 12              |
| 126           | Pale Lager            | No    | Czech Republic | 4.0  | -                 | -   | 0.2 | 6   | 0.3 | 6               |
| 127           | Pale Lager            | No    | Czech Republic | 5.0  | -                 | -   | -   | 4   | 0.3 | 2               |
| 133           | Pale Lager            | No    | Czech Republic | 4.8  | -                 | 18  | -   | 5   | 0.4 | 12              |
| 139           | Pale Lager            | No    | Czech          | 5.0  | -                 | 24  | -   | -   | 0.3 | 2               |
| 163           | Pilsner               | No    | Netherlands    | 5.0  | -                 | -   | -   | -   | 0.4 | -               |
| 190           | Premium Lager         | No    | Poland         | 5.5  | -                 | -   | -   | -   | 0.3 | -               |

| Sample number | Designated Style        | Craft | Country       | %ABV | Mycotoxins (µg/L) |     |     |     |     |                 |
|---------------|-------------------------|-------|---------------|------|-------------------|-----|-----|-----|-----|-----------------|
|               |                         |       |               |      | AFB <sub>1</sub>  | DON | ZEN | T-2 | OTA | FB <sub>1</sub> |
| 191           | Premium Lager           | Yes   | England       | 5.0  | -                 | -   | -   | -   | 0.4 | -               |
| 199           | Premium Lager           | No    | Poland        | 5.6  | -                 | -   | -   | -   | 0.5 | -               |
| 208           | Pale Lager              | No    | Poland        | 5.0  | -                 | 31  | -   | -   | -   | 9               |
| 209           | Pilsner                 | No    | Netherlands   | 5.0  | -                 | -   | 0.8 | -   | 0.3 | 2               |
| 214           | Pilsner                 | No    | Germany       | 4.8  | -                 | -   | -   | -   | 0.3 | 1               |
| 215           | Pale Lager              | No    | Poland        | 5.2  | -                 | 1   | 0.1 | -   | 0.5 | 36              |
| 218           | Premium Lager           | No    | Poland        | 5.2  | -                 | -   | -   | -   | 0.4 | 1               |
| 221           | Pilsner                 | No    | France        | 5.5  | -                 | -   | -   | -   | 0.2 | -               |
| 222           | Pilsner                 | No    | France        | 4.2  | -                 | -   | 0.9 | -   | 0.3 | -               |
| 223           | Pilsner                 | No    | Netherlands   | 5.0  | -                 | -   | 1.3 | -   | 0.3 | -               |
| 239           | Pilsner                 | No    | Netherlands   | 5.0  | -                 | -   | -   | -   | 0.3 | -               |
| 241           | Helles Lager            | No    | Germany       | 4.7  | -                 | -   | -   | -   | 0.3 | -               |
| 246           | Pilsner                 | No    | Germany       | 4.9  | -                 | -   | -   | -   | 0.3 | -               |
| 250           | Zwickel/Keller/Landbier | No    | Germany       | 4.9  | -                 | -   | -   | -   | 0.3 | -               |
| 260           | Pale Lager              | No    | China         | 4.3  | -                 | -   | -   | -   | 0.3 | -               |
| 261           | Pale Lager              | No    | China         | 4.0  | -                 | -   | -   | -   | 0.3 | -               |
| 262           | Pale Lager              | No    | China         | 5.0  | -                 | -   | -   | -   | 0.3 | -               |
| 263           | Pale Lager              | No    | China         | 5.0  | -                 | -   | -   | -   | 0.3 | -               |
| 264           | Adjunct Lager           | No    | Australia     | 3.5  | -                 | -   | -   | -   | 0.3 | -               |
| 265           | Euro Pale Lager         | No    | Australia     | 3.5  | -                 | -   | -   | -   | 0.3 | -               |
| 266           | Adjunct Lager           | No    | Australia     | 4.6  | -                 | -   | -   | -   | 0.3 | -               |
| 269           | Pale Lager              | No    | Japan         | 5.5  | -                 | -   | -   | -   | -   | -               |
| 270           | Pale Lager              | No    | Japan         | 5.5  | -                 | -   | 1.6 | -   | -   | -               |
| 271           | Pale Lager              | No    | Japan         | 5.0  | -                 | -   | 0.1 | -   | -   | -               |
| 276           | Pale Lager              | No    | Kenya         | 4.2  | -                 | -   | -   | -   | 0.3 | -               |
| 277           | Pale Lager              | No    | Kenya         | 5.0  | -                 | -   | -   | -   | 0.2 | -               |
| 279           | Pilsner                 | No    | South Africa  | 5.0  | -                 | -   | -   | 2   | 0.3 | -               |
| 280           | Specialty Grain         | No    | Zimbabwe      | 5.0  | -                 | -   | -   | 2   | 0.3 | 11              |
| 281           | Pale Lager              | No    | Namibia       | 4.0  | -                 | -   | -   | 2   | 0.2 | -               |
| 282           | Premium Lager           | No    | Namibia       | 4.0  | -                 | -   | -   | -   | 0.2 | -               |
| 284           | Lager                   | No    | South Africa  | 5.0  | -                 | -   | -   | 2   | 0.3 | -               |
| 285           | Lager                   | No    | South Africa  | 4.0  | -                 | 22  | -   | -   | 0.3 | -               |
| 287           | Pale Lager              | No    | South Africa  | 5.0  | -                 | 18  | -   | -   | 0.3 | -               |
| 288           | Pale Lager              | No    | South Africa  | 5.0  | -                 | 6   | -   | -   | 0.3 | 11              |
| 289           | Pale Lager              | No    | South Africa  | 5.5  | -                 | -   | -   | -   | 0.3 | -               |
| 290           | Pilsner                 | No    | South Africa  | 4.5  | -                 | 4   | 1.6 | 1   | 0.3 | -               |
| 298           | Pale Lager              | No    | Jamaica       | 4.7  | -                 | -   | -   | 4   | 0.3 | 7               |
| 336           | California Common       | Yes   | United States | 5.5  | -                 | 23  | -   | 1   | 0.3 | 8               |
| 342           | Pilsner                 | Yes   | United States | 4.9  | -                 | 14  | -   | 1   | 0.3 | 4               |
| 386           | Pale Lager              | No    | Spain         | 4.8  | -                 | -   | -   | 6   | 0.3 | 7               |
| 388           | Pale Lager              | No    | Spain         | 5.4  | -                 | -   | -   | -   | 0.3 | 22              |
| 390           | Pale Lager              | No    | Spain         | 4.8  | -                 | -   | -   | 2   | 0.4 | 23              |
| 392           | Pale Lager              | No    | Peru          | 5.0  | -                 | -   | -   | -   | 0.3 | 21              |

| Sample number | Designated Style        | Craft | Country      | %ABV | Mycotoxins (µg/L) |     |     |     |     |                 |
|---------------|-------------------------|-------|--------------|------|-------------------|-----|-----|-----|-----|-----------------|
|               |                         |       |              |      | AFB <sub>1</sub>  | DON | ZEN | T-2 | OTA | FB <sub>1</sub> |
| 397           | Imperial Pilsner        | No    | Spain        | 6.5  | -                 | 18  | -   | -   | 0.3 | 35              |
| 399           | Adjunct Lager           | No    | Spain        | 5.5  | -                 | -   | -   | -   | 0.3 | 36              |
| 404           | Pale Lager              | No    | South Africa | 5.0  | -                 | -   | 0.4 | -   | -   | 3               |
| 447           | Pale Lager              | No    | Spain        | 4.8  | -                 | -   | -   | 9   | -   | 51              |
| 455           | Zwickel/Keller/Landbier | No    | Netherlands  | 5.0  | -                 | -   | 1.7 | 8   | 0.1 | 15              |
| 459           | Specialty Grain         | No    | Germany      | 5.0  | -                 | 15  | -   | 8   | 0.2 | 3               |
| 465           | Pale Lager              | No    | Mexico       | 4.5  | -                 | -   | -   | 9   | 0.1 | 18              |
| 475           | California Common       | Yes   | Denmark      | 3.5  | -                 | -   | -   | 8   | 0.4 | 21              |
| 476           | Specialty Grain         | Yes   | Netherlands  | 6.5  | -                 | 6   | -   | 3   | -   | 21              |
| 483           | Pale Lager              | No    | Italy        | 4.8  | -                 | -   | -   | 3   | 0.2 | 33              |
| 484           | Pilsner                 | No    | Italy        | 5.0  | -                 | -   | -   | 2   | 0.2 | 29              |
| 485           | Pale Lager              | No    | Italy        | 3.5  | -                 | 8   | -   | 2   | 0.3 | 45              |
| 486           | Pale Lager              | No    | Italy        | 4.8  | -                 | -   | -   | 3   | 0.3 | 8               |
| 487           | Pale Lager              | No    | Italy        | 5.0  | -                 | -   | -   | -   | 0.2 | -               |
| 488           | Pale Lager              | No    | Italy        | 4.7  | -                 | -   | -   | -   | 0.2 | 71              |
| 489           | Pale Lager              | No    | Italy        | 4.7  | -                 | -   | -   | 1   | 0.2 | 36              |
| 491           | Pale Lager              | No    | Italy        | 3.5  | -                 | 34  | -   | -   | 0.2 | 64              |
| 492           | Premium Lager           | No    | Italy        | 5.1  | -                 | 6   | -   | -   | -   | 40              |
| 493           | Pale Lager              | No    | Italy        | 4.7  | -                 | -   | -   | -   | -   | 59              |
| 495           | Pale Lager              | No    | Italy        | 4.6  | -                 | 11  | -   | -   | 0.1 | 45              |
| 496           | Pale Lager              | No    | Italy        | 4.8  | -                 | -   | -   | -   | -   | 10              |
| 497           | Pale Lager              | No    | Italy        | 4.7  | -                 | 7   | -   | -   | 0.1 | 55              |
| 498           | Pale Lager              | No    | Italy        | 4.5  | -                 | -   | -   | -   | -   | 56              |
| 499           | Pale Lager              | No    | Italy        | 4.5  | -                 | 20  | -   | -   | 0.2 | 52              |
| 525           | Pale Lager              | No    | India        | 4.8  | -                 | -   | -   | 7   | 0.3 | 25              |
| 526           | Pilsner                 | No    | Belgium      | 5.2  | -                 | -   | 1.2 | 4   | 0.3 | 38              |
| 528           | Pilsner                 | No    | Netherlands  | 5.0  | 0.6               | -   | -   | 5   | 0.2 | 28              |
| 529           | Pilsner                 | No    | Netherlands  | 5.0  | -                 | -   | 1.2 | 9   | 0.4 | 29              |
| 531           | Pilsner                 | No    | Netherlands  | 7.5  | -                 | -   | 0.8 | 8   | 0.3 | 39              |
| 536           | Pilsner                 | No    | Netherlands  | 5.0  | -                 | -   | -   | 7   | 0.3 | 23              |
| 538           | Pilsner                 | No    | Netherlands  | 5.0  | -                 | -   | -   | 16  | 0.5 | 64              |
| 539           | Pilsner                 | No    | Netherlands  | 5.0  | -                 | -   | 1.7 | 9   | 0.4 | 56              |
| 541           | Pilsner                 | No    | Netherlands  | 5.1  | -                 | -   | 0.8 | 1   | -   | 33              |
| 542           | Pilsner                 | Yes   | Netherlands  | 5.0  | -                 | -   | -   | 8   | 0.5 | 39              |
| 546           | Pilsner                 | No    | Netherlands  | 5.1  | -                 | -   | -   | 9   | 0.4 | 53              |
| 547           | Pilsner                 | No    | Netherlands  | 5.0  | -                 | -   | -   | 6   | 0.2 | 7               |
| 548           | Pilsner                 | No    | Germany      | 5.0  | -                 | -   | 0.4 | 5   | 0.2 | 6               |
| 549           | Pilsner                 | No    | Netherlands  | 5.0  | 0.18              | -   | 0.4 | 4   | 0.2 | 14              |
| 558           | Pilsner                 | No    | Netherlands  | 5.3  | -                 | 4   | -   | 6   | 0.4 | 20              |
| 560           | Imperial Pilsner        | No    | Netherlands  | 5.5  | 0.19              | -   | -   | 3   | 0.1 | 4               |
| 567           | Pilsner                 | No    | Netherlands  | 5.0  | -                 | 6   | -   | 3   | 0.1 | 15              |
| 575           | Pilsner                 | No    | Germany      | 4.9  | 0.17              | 6   | -   | 5   | 0.3 | 13              |

|      |                      |     |              |     |      |    |     |   |     |    |
|------|----------------------|-----|--------------|-----|------|----|-----|---|-----|----|
| 578  | Adjunct Lager        | No  | Australia    | 5.0 | -    | -  | -   | 6 | 0.2 | 15 |
| 627  | Pilsner              | No  | Germany      | 4.8 | -    | -  | -   | 3 | 0.3 | 1  |
| 643  | Pilsner              | No  | Germany      | 4.9 | 0.12 | -  | -   | 9 | 0.3 | 11 |
| 698  | Lager                | No  | Poland       | 5.2 | -    | 70 | -   | - | 0.2 | 5  |
| 704  | Pilsner              | No  | Germany      | 4.9 | -    | -  | -   | 3 | 0.2 | -  |
| 706  | Kellerbier           | No  | Germany      | 5.3 | -    | -  | -   | 5 | 0.3 | -  |
| 709  | Pilsner              | No  | Germany      | 4.9 | -    | -  | -   | 5 | 0.3 | -  |
| 712  | Adjunct Lager        | Yes | USA          | 4.5 | -    | 26 | -   | - | -   | 3  |
| 721  | Pale Lager           | No  | Japan        | 5.0 | -    | -  | 0.5 | 7 | 0.2 | -  |
| 728  | Pale Lager           | No  | Japan        | 5.0 | -    | -  | 0.1 | 9 | 0.2 | -  |
| 736  | Lager                | Yes | Denmark      | 5.6 | -    | -  | -   | 7 | 0.3 | -  |
| 774  | Pale Lager           | No  | South Africa | 4.5 | -    | -  | -   | - | 0.1 | -  |
| 775  | Pale Lager           | No  | South Africa | 5.0 | -    | -  | -   | - | 0.1 | 3  |
| 776  | Pale Lager           | No  | South Africa | 5.5 | -    | -  | -   | - | 0.1 | -  |
| 777  | Pale Lager           | No  | South Africa | 3.5 | -    | -  | -   | - | 0.2 | 2  |
| 785  | Specialty Grain      | No  | Germany      | 4.5 | -    | 42 | 1.2 | 3 | 1.1 | 13 |
| 875  | Specialty Grain      | Yes | Netherlands  | 5.0 | -    | -  | -   | - | 0.1 | -  |
| 895  | Specialty Grain      | No  | Germany      | 5.0 | -    | -  | -   | - | -   | -  |
| 925  | Pale Lager           | No  | Spain        | 4.8 | 0.59 | -  | -   | - | -   | 17 |
| 926  | Pale Lager           | No  | Spain        | 5.4 | -    | -  | -   | - | -   | 4  |
| 927  | Pale Lager           | No  | Spain        | 4.8 | -    | -  | -   | - | -   | 23 |
| 928  | Pale Lager           | No  | Spain        | 4.2 | -    | -  | -   | 1 | 0.2 | 3  |
| 930  | Pale Lager           | No  | Spain        | 4.8 | -    | -  | -   | - | -   | 72 |
| 932  | Pale Lager           | No  | Spain        | 5.5 | -    | -  | -   | 1 | -   | 3  |
| 933  | American Style Lager | No  | Spain        | 5.0 | -    | -  | 3.3 | - | -   | 51 |
| 934  | Pilsner              | No  | Spain        | 5.5 | -    | -  | 3.6 | - | -   | 10 |
| 935  | Pale Lager           | No  | Spain        | 4.8 | -    | -  | 5.6 | - | -   | 11 |
| 936  | Imperial Pilsner     | No  | Spain        | 6.4 | -    | -  | -   | - | -   | 24 |
| 938  | American Style Lager | No  | Spain        | 5.0 | -    | -  | -   | - | 0.2 | 20 |
| 939  | Pale Lager           | No  | Spain        | 4.8 | -    | -  | -   | - | 0.3 | -  |
| 941  | Pale Lager           | No  | Spain        | 5.8 | -    | -  | -   | - | 0.2 | 26 |
| 942  | Pale Lager           | No  | Spain        | 6.2 | -    | -  | -   | - | 0.2 | -  |
| 943  | American Style Lager | No  | Spain        | 4.8 | -    | -  | -   | - | 0.2 | -  |
| 945  | Pale Lager           | No  | Spain        | 5.4 | -    | -  | -   | - | -   | 6  |
| 946  | Specialty Grain      | No  | Spain        | 5.4 | -    | -  | -   | - | -   | -  |
| 947  | Pale Lager           | No  | Spain        | 4.0 | -    | -  | -   | - | -   | -  |
| 968  | Pilsner              | Yes | Nederland    | 5.0 | -    | -  | -   | - | 0.2 | -  |
| 1028 | Pale Lager           | No  | Spain        | 4.2 | -    | -  | -   | - | 0.1 | -  |
| 1029 | Pale Lager           | No  | Spain        | 5.4 | -    | -  | -   | - | 0.1 | 6  |
| 1040 | Adjunct Lager        | No  | Portugal     | 5.6 | -    | -  | -   | - | 0.1 | -  |
| 1051 | Adjunct Lager        | No  | Portugal     | 5.1 | -    | -  | -   | - | 0.1 | -  |

- = no mycotoxins detected

**S5 Table. M 6-plex immunoassay screening data saison beers**

| Sample Number | Designated Style       | Craft | Country     | %ABV | Mycotoxins (µg/L) |     |     |     |     |                 |
|---------------|------------------------|-------|-------------|------|-------------------|-----|-----|-----|-----|-----------------|
|               |                        |       |             |      | AFB <sub>1</sub>  | DON | ZEN | T-2 | OTA | FB <sub>1</sub> |
| 144           | Saison                 | No    | Belgium     | 6.0  | -                 | -   | -   | -   | 0.4 | 7               |
| 149           | Biere de garde         | Yes   | France      | 6.9  | -                 | -   | -   | -   | 0.3 | -               |
| 227           | Biere de garde         | No    | France      | 7.5  | -                 | -   | 0.4 | -   | 0.2 | -               |
| 696           | Saison                 | No    | Belgium     | 6.5  | -                 | -   | 0.4 | 2   | 0.3 | -               |
| 735           | Bière de Garde         | Yes   | USA         | 8.8  | -                 | -   | 0.2 | -   | -   | -               |
| 758           | Saison                 | Yes   | Canada      | 9.0  | -                 | 19  | -   | 1   | 0.2 | 10              |
| 763           | Saison                 | Yes   | Japan       | 5.5  | -                 | -   | -   | 3   | 0.4 | 5               |
| 858           | Saison                 | Yes   | Belgium     | 6.0  | -                 | -   | -   | -   | -   | -               |
| 861           | Saison/Specialty Grain | Yes   | USA         | 6.0  | -                 | -   | -   | -   | 0.1 | -               |
| 864           | Saison                 | Yes   | USA         | 10.4 | -                 | -   | -   | -   | -   | -               |
| 878           | Saison                 | Yes   | Netherlands | 8.5  | -                 | -   | -   | -   | 0.4 | 1               |
| 908           | Saison                 | Yes   | Belgium     | 6.9  | 1.3               | -   | 1.0 | -   | -   | 5               |
| 954           | Saison                 | Yes   | Latvia      | 4.5  | -                 | -   | -   | -   | -   | -               |

- = no mycotoxins detected

**S5 Table. N 6-plex immunoassay screening data smoked beers**

| Sample Number | Designated Style             | Craft | Country     | %ABV | Mycotoxins (µg/L) |     |     |     |     |                 |
|---------------|------------------------------|-------|-------------|------|-------------------|-----|-----|-----|-----|-----------------|
|               |                              |       |             |      | AFB <sub>1</sub>  | DON | ZEN | T-2 | OTA | FB <sub>1</sub> |
| 16            | Smoked beer                  | Yes   | Netherlands | 7.5  | -                 | 11  | -   | -   | 0.1 | -               |
| 178           | Smoked beer                  | No    | Germany     | 5.1  | -                 | 44  | -   | -   | 0.5 | 12              |
| 236           | Smoked Bock                  | Yes   | Belgium     | 6.7  | -                 | 62  | -   | -   | -   | 2               |
| 369           | Smoked                       | Yes   | Netherlands | 11.0 | 3.0               | 94  | -   | 2   | 0.4 | 8               |
| 377           | Smoked                       | Yes   | Denmark     | 6.1  | -                 | 47  | 0.1 | 2   | 0.3 | 6               |
| 474           | Smoked Ale                   | Yes   | Belgium     | 6.5  | 0.1               | 9   | -   | 8   | -   | 30              |
| 543           | Smoked                       | Yes   | Netherlands | 8.2  | 0.7               | 42  | -   | -   | -   | 39              |
| 684           | Smoked Barley-Wine Style Ale | Yes   | Norway      | 11.0 | -                 | 4   | -   | -   | 0.3 | 2               |
| 694           | Smoked                       | Yes   | USA         | 7.5  | -                 | 1   | -   | 1   | 0.1 | 2               |
| 827           | Smoked                       | No    | Germany     | 6.9  | -                 | 18  | -   | -   | 0.5 | 2               |
| 828           | Smoked                       | No    | Germany     | 5.1  | 0.1               | -   | -   | 1   | 0.4 | 6               |
| 829           | Smoked                       | Yes   | Netherlands | 6.5  | -                 | 128 | -   | -   | 0.3 | -               |
| 831           | Smoked                       | No    | Germany     | 5.2  | -                 | -   | -   | -   | 0.3 | 3               |
| 833           | Smoked                       | Yes   | Netherlands | 6.5  | -                 | -   | -   | -   | 0.5 | -               |
| 841           | Smoked                       | Yes   | Belgium     | 6.7  | -                 | -   | -   | -   | 0.3 | -               |
| 975           | Smoked                       | Yes   | USA         | 6.5  | -                 | 7   | -   | -   | 0.2 | -               |

- = no mycotoxins detected

**S5 Table. O** 6-plex immunoassay screening data sour ale beers

| Sample Number | Designated Style   | Craft | Country       | %ABV | Mycotoxins (µg/L) |     |     |     |     |                 |
|---------------|--------------------|-------|---------------|------|-------------------|-----|-----|-----|-----|-----------------|
|               |                    |       |               |      | AFB <sub>1</sub>  | DON | ZEN | T-2 | OTA | FB <sub>1</sub> |
| 14            | Geuze              | Yes   | Belgium       | 5.0  |                   |     |     |     |     | 17              |
| 19            | Geuze              | Yes   | Belgium       | 5.0  | -                 | -   | -   | -   |     | 1               |
| 30            | Geuze              | Yes   | Belgium       | 5.0  | -                 | -   | -   | -   |     | 3               |
| 37            | Geuze              | No    | Belgium       | 5.2  | -                 | -   | -   | -   |     | 1               |
| 41            | Flanders Oud Bruin | Yes   | Belgium       | 8.0  | -                 | 1   | -   | -   |     |                 |
| 63            | Geuze              | Yes   | Belgium       | 5.0  | -                 | -   | -   | -   |     | 10              |
| 86            | Sour/Lambic        | Yes   | United States | 10.0 | -                 | -   | -   | -   | 0.1 | 10              |
| 90            | Geuze              | Yes   | Belgium       | 6.0  | -                 | -   | -   | -   |     | 2               |
| 119           | Geuze              | Yes   | Belgium       | 5.0  | -                 | -   | -   | -   |     |                 |
| 140           | Geuze              | Yes   | Belgium       | 6.0  | -                 | -   | -   | -   |     | 2               |
| 143           | Geuze              | Yes   | Belgium       | 6.0  | -                 | -   | -   | -   |     |                 |
| 147           | Geuze              | Yes   | Belgium       | 6.0  | -                 | -   | -   | -   | 0.5 | 14              |
| 152           | Geuze              | Yes   | Belgium       | 6.5  | -                 | -   | -   | -   | 0.6 |                 |
| 156           | Geuze              | Yes   | Belgium       | 6.0  | -                 | -   | -   | -   | -   |                 |
| 170           | Sour Ale/Wild Ale  | Yes   | France        | 7.0  | -                 | -   | -   | -   | -   |                 |
| 174           | Geuze              | Yes   | Belgium       | 6.0  | -                 | -   | -   | -   | -   | 15              |
| 188           | Belgain Strong Ale | Yes   | Swiss         | 11.0 | -                 | -   | -   | -   | -   | -               |
| 233           | Sour Ale/Wild Ale  | No    | Belgium       | 7.3  | -                 | -   | -   | -   | -   | -               |
| 291           | Geuze              | Yes   | Belgium       | 5.0  | -                 | -   | 0.1 | 13  | -   | 17              |
| 295           | Flanders Oud Bruin | Yes   | Belgium       | 13.0 | -                 | -   | 1.3 | -   | -   | -               |
| 296           | Geuze              | Yes   | Belgium       |      | -                 | -   |     | -   | -   | 25              |
| 301           | Geuze              | Yes   | Belgium       | 7.0  | -                 | 116 | 0.4 | -   | -   | 38              |
| 303           | Sour Ale/Wild Ale  | Yes   | Denmark       | 10.0 | -                 |     | 1.2 | -   | -   | -               |
| 310           | Geuze              | Yes   | Belgium       | 8.0  | -                 | 25  | -   | -   | -   | -               |
| 313           | Lambic             | Yes   | Belgium       | 8.0  | -                 | -   | -   | -   | -   | 8               |
| 319           | Geuze              | Yes   | Belgium       | 5.0  | -                 | -   | -   | -   | -   | 32              |
| 322           | Geuze              | Yes   | Belgium       | nd   | -                 | -   | -   | -   | -   | -               |
| 327           | Lambic             | Yes   | Italy         | 8.0  | -                 | -   | -   | -   | -   | 5               |
| 328           | Lambic             | Yes   | Italy         | 6.2  | -                 | 21  | -   | -   | -   | 8               |
| 334           | Geuze              | Yes   | Belgium       | 6.0  | -                 | 8   | -   | -   | -   | 3               |
| 340           | Lambic             | Yes   | Belgium       | 8.0  | -                 | -   | -   | -   | 0.3 | 28              |
| 343           | Lambic             | Yes   | Belgium       | 6.0  | -                 | -   | -   | -   | -   |                 |
| 358           | Lambic             | Yes   | Italy         | 6.2  | -                 | -   | -   | -   | -   | 2               |
| 359           | Lambic             | Yes   | Denmark       | 7.7  | -                 | -   | -   | -   | -   | 11              |
| 364           | Lambic             | Yes   | Italy         | 6.7  | -                 | -   | -   | -   | -   | 5               |
| 383           | Lambic             | Yes   | Denmark       | 5.0  | -                 | -   | -   | -   | -   | 9               |
| 433           | Lambic             | Yes   | Belgium       | 5.0  | -                 | -   | -   | -   | -   | 54              |
| 445           | Sour Ale/Wild Ale  | Yes   | Denmark       | 8.5  | -                 | -   | -   | -   | -   | -               |
| 522           | Sour Ale/Wild Ale  | Yes   | Italy         | 6.2  | -                 | -   | -   | -   | -   | -               |
| 551           | Sour Ale           | No    | Belgium       | 6.0  | -                 | -   | 0.2 |     | -   | 7               |
| 562           | Sour Ale           | No    | Belgium       | 6.2  | -                 | -   | -   | 2   | -   | 19              |



| Sample number | Designated Style              | Craft | Country     | %ABV | Mycotoxins (µg/L) |     |     |     |     |                 |
|---------------|-------------------------------|-------|-------------|------|-------------------|-----|-----|-----|-----|-----------------|
|               |                               |       |             |      | AFB <sub>1</sub>  | DON | ZEN | T-2 | OTA | FB <sub>1</sub> |
| 566           | Lambic                        | No    | Belgium     | 5.2  | -                 | 8   | -   | -   | -   | 11              |
| 579           | Sour Ale/Wild Ale             | Yes   | USA         | 7.0  | -                 | -   | 0.3 | -   | -   | -               |
| 591           | Lambic                        | Yes   | Belgium     | 5.0  | -                 | -   | -   | -   | -   | -               |
| 597           | Lambic                        | Yes   | Italy       | 9.0  | -                 | 14  | -   | 4   | -   | 15              |
| 601           | Geuze                         | Yes   | Belgium     | 5.0  | -                 | -   | -   | -   | -   | -               |
| 610           | Lambic                        | Yes   | Belgium     | 6.0  | -                 | -   | -   | -   | -   | 10              |
| 615           | Lambic                        | Yes   | Belgium     | 6.0  | -                 | -   | -   | -   | -   | -               |
| 635           | Geuze                         | No    | Belgium     | 5.0  | -                 | -   | -   | -   | -   | -               |
| 636           | Geuze                         | Yes   | Belgium     | 6.0  | -                 | -   | -   | -   | -   | -               |
| 640           | Sour Ale/Wild Ale             | Yes   | USA         | 6.8  | -                 | -   | 0.1 | 10  | -   | 10              |
| 646           | Lambic                        | Yes   | Belgium     | 5.0  | -                 | -   | -   | 4   | -   | 8               |
| 650           | Faro                          | Yes   | Belgium     | 8.0  | -                 | -   | -   | -   | -   | -               |
| 653           | Geuze                         | Yes   | Belgium     | 6.0  | -                 | -   | -   | -   | -   | 6               |
| 670           | Lambic                        | Yes   | Belgium     |      | -                 | -   | -   | -   | -   | -               |
| 677           | Lambic                        | Yes   | Denmark     | 8.0  | -                 | -   | -   | -   | -   | 10              |
| 679           | Gose                          | Yes   | USA         | 4.4  | -                 | -   | -   | -   | -   | 1               |
| 680           | Wild Ale                      | Yes   | Belgium     | 7.0  | -                 | -   | -   | -   | -   | 1               |
| 685           | Sour Ale/Wild Ale             | Yes   | Belgium     | 10.0 | -                 | 15  | -   | -   | -   | -               |
| 690           | Lambic                        | Yes   | Belgium     | 5.0  | -                 | -   | -   | -   | -   | 2               |
| 702           | Lambic                        | Yes   | Belgium     | 8.0  | -                 | -   | -   | -   | -   | -               |
| 705           | Geuze                         | Yes   | Belgium     | 6.0  | -                 | -   | -   | 2   | 0.3 | -               |
| 708           | Geuze                         | Yes   | Belgium     | 8.0  | -                 | 8   | -   | -   | -   | 2               |
| 725           | Lambic                        | Yes   | Belgium     | 5.0  | -                 | -   | 0.8 | 31  | 0.3 | 18              |
| 731           | Lambic                        | Yes   | Belgium     | 6.0  | -                 | -   | -   | -   | -   | 1               |
| 743           | Sour Ale/Wild Ale             | Yes   | Netherlands | 4.6  | -                 | -   | -   | 4   | 0.1 | -               |
| 749           | Berliner weisse               | Yes   | Denmark     | 3.4  | -                 | -   | -   | -   | -   | -               |
| 773           | Lambic                        | No    | Belgium     | 3.2  | -                 | -   | -   | -   | -   | -               |
| 782           | Lambic                        | No    | Belgium     | 4.0  | -                 | 36  | -   | 8   | -   | 19              |
| 787           | Geuze                         | Yes   | Belgium     | 4.5  | -                 | 40  | -   | -   | 0.7 | 13              |
| 817           | Lambic                        | Yes   | Belgium     | 6.0  | -                 | 62  | -   | -   | 1.2 | -               |
| 819           | Geuze                         | Yes   | Belgium     | 6.0  | -                 | 133 | -   | -   | 1.6 | -               |
| 821           | Geuze                         | Yes   | Belgium     | 5.2  | -                 | 141 | -   | -   | 0.9 | -               |
| 847           | Geuze                         | Yes   | Belgium     | 5.5  | -                 | -   | -   | -   | -   | -               |
| 852           | Geuze                         | Yes   | Belgium     | 6.0  | -                 | -   | -   | -   | -   | -               |
| 857           | Geuze                         | Yes   | Belgium     | 5.0  | -                 | -   | -   | -   | -   | -               |
| 879           | Lambic                        | No    | Belgium     | 6.5  | -                 | -   | -   | -   | -   | -               |
| 886           | Sour red/Brown                | No    | Belgium     | 7.0  | -                 | -   | -   | -   | 0.9 | -               |
| 887           | Sour red/Brown                | Yes   | Belgium     | 13.0 | -                 | -   | -   | -   | -   | -               |
| 953           | American Wild Ale             | Yes   | USA         | 7.5  | -                 | -   | -   | -   | -   | -               |
| 960           | Grodziskie/gose/lichtenhainer | Yes   | Poland      | 2.6  | -                 | -   | -   | -   | 0.3 | -               |
| 970           | American Wild Ale             | Yes   | USA         | 6.8  | -                 | -   | -   | -   | -   | -               |

- = no mycotoxins detected

**S5 Table. P** 6-plex immunoassay screening data stout beers

| Sample Number | Designated Style | Craft | Country           | %ABV | Mycotoxins (µg/L) |     |     |     |     |                 |
|---------------|------------------|-------|-------------------|------|-------------------|-----|-----|-----|-----|-----------------|
|               |                  |       |                   |      | AFB <sub>1</sub>  | DON | ZEN | T-2 | OTA | FB <sub>1</sub> |
| 1             | Wild Porter      | Yes   | Belgium           | 7.0  | -                 | 69  | -   | -   | -   | 12              |
| 36            | Stout            | No    | Ireland           | 4.1  | -                 | 34  | -   | -   | 0.3 | 11              |
| 77            | Porter           | No    | England           | 5.4  | -                 | 45  | -   | -   | 0.5 | 20              |
| 138           | Porter           | No    | Czech Republic    | 10.5 | -                 | 49  | -   | -   | -   | -               |
| 157           | Oatmeal Stout    | Yes   | United States     | 5.7  | -                 | 100 | -   | 2   | 0.3 | 28              |
| 160           | Imperial Stout   | Yes   | Sweden            | 7.5  | -                 | 135 | -   | 4   | 0.2 | 50              |
| 198           | Imperial Stout   | Yes   | Netherlands       | 7.5  | -                 | -   | 0.3 | -   | 0.3 | 3               |
| 229           | Imperial Stout   | Yes   | England           | 7.0  | -                 | 48  | 0.5 | -   | 0.3 | 5               |
| 254           | Sweet Stout      | Yes   | Netherlands       | 5.5  | -                 | -   | 0.4 | -   | -   | -               |
| 267           | Milk Stout       | No    | Trinidad & Tobago | 4.9  | -                 | -   | 1.0 | -   | -   | -               |
| 268           | Foreign Stout    | No    | Malaysia          | 6.8  | -                 | -   | -   | -   | -   | -               |
| 275           | Foreign Stout    | No    | Nigeria           | 6.5  | -                 | -   | -   | -   | 0.2 | 19              |
| 286           | Milk Stout       | No    | South Africa      | 6.0  | -                 | 3   | -   | -   | 0.3 | 3               |
| 297           | Porter           | Yes   | Germany           | 8.0  | -                 | 93  | 1.2 | -   | -   | 29              |
| 326           | Imperial Stout   | Yes   | Italy             | 7.0  | -                 | 169 | -   | -   | 0.3 | 34              |
| 350           | Porter           | Yes   | Denmark           | 6.6  | -                 | 108 | 3.0 | -   | 0.2 | 27              |
| 357           | Stout            | Yes   | England           | 5.5  | -                 | 38  | -   | 3   | 0.3 | 13              |
| 431           | Imperial Stout   | Yes   | England           | 7.0  | 0.2               | 49  | -   | 6   | 0.2 | 96              |
| 469           | Imperial Stout   | Yes   | Netherlands       | 7.5  | -                 | 12  | -   | 2   | 0.2 | 8               |
| 473           | Porter           | Yes   | United States     | 5.7  | 0.1               | -   | -   | 11  | 0.3 | 15              |
| 563           | Imperial Stout   | Yes   | Netherlands       | 7.5  | 0.9               | 27  | -   | 1   | 0.2 | 19              |
| 595           | Porter           | Yes   | USA               | 6.7  | -                 | -   | -   | 3   | 0.3 | 9               |
| 600           | Foreign Stout    | No    | England           | 7.4  | 1.9               | 70  | -   | 2   | 0.2 | 57              |
| 632           | Stout            | Yes   | England           | 5.0  | -                 | 14  | -   | 1   | 0.3 | 7               |
| 634           | Porter           | Yes   | USA               | 6.4  | 0.4               | 71  | -   | 2   | -   | 11              |
| 637           | Stout            | No    | England           | 5.0  | 0.6               | 2   | -   | 8   | 0.3 | 13              |
| 641           | Porter           | Yes   | USA               | 6.4  | -                 | 75  | 0.3 | -   | -   | 7               |
| 647           | Porter           | Yes   | USA               | 6.4  | -                 | 41  | -   | -   | -   | 1               |
| 660           | Porter           | Yes   | USA               | 5.9  | 0.2               | -   | -   | 6   | 0.4 | 2               |
| 661           | Baltic Porter    | No    | Russia            | 7.0  | -                 | 1   | -   | 5   | 0.4 | 4               |
| 681           | Baltic Porter    | Yes   | USA               | 6.4  | -                 | 16  | -   | -   | 0.3 | 7               |
| 693           | Stout            | Yes   | Denmark           | 7.7  | -                 | 3   | -   | -   | -   | 1               |
| 699           | Foreign Stout    | No    | Australia         | 6.3  | -                 | 24  | -   | 1   | 0.2 | 5               |
| 707           | Stout            | Yes   | Denmark           | 7.0  | -                 | 66  | -   | -   | 0.1 | 3               |
| 718           | Porter           | Yes   | Denmark           | 6.8  | -                 | 12  | -   | 6   | 0.4 | 4               |
| 722           | Porter           | Yes   | USA               | 10.5 | 1.0               | 57  | 1.0 | 4   | 0.4 | 12              |
| 753           | Porter           | Yes   | France            | 8.0  | -                 | 10  | -   | 5   | 0.4 | 7               |
| 757           | Stout            | Yes   | USA               | 7.1  | -                 | 43  | -   | 3   | 0.4 | 21              |
| 802           | Stout            | Yes   | Netherlands       | 7.4  | 2.8               | 124 | -   | 4   | -   | 29              |
| 812           | Porter           | Yes   | England           | 4.5  | -                 | -   | -   | -   | -   | -               |
| 813           | Porter           | Yes   | USA               | 3.0  | -                 | 22  | -   | -   | -   | -               |

| Sample number | Designated Style | Craft | Country     | %ABV | Mycotoxins (µg/L) |     |     |     |     |                 |
|---------------|------------------|-------|-------------|------|-------------------|-----|-----|-----|-----|-----------------|
|               |                  |       |             |      | AFB <sub>1</sub>  | DON | ZEN | T-2 | OTA | FB <sub>1</sub> |
| 815           | Foreign Stout    | No    | Netherlands | 7.2  | -                 | -   | -   | 1   | -   | 5               |
| 826           | Porter           | Yes   | USA         | 6.8  | 0.1               | -   | -   | 1   | 0.5 | -               |
| 851           | Stout            | Yes   | Austria     | 4.4  | -                 | -   | -   | -   | 0.5 | 3               |
| 855           | Stout            | No    | England     | 2.8  | -                 | -   | -   | -   | -   | -               |
| 881           | Dry Stout        | Yes   | Belgium     | 7.0  | -                 | 12  | -   | 2   | 0.5 | 4               |
| 903           | Oatmeal Stout    | Yes   | USA         | 6.9  | -                 | 88  | -   | -   | 0.3 | 3               |
| 914           | Porter           | Yes   | Iceland     | 6.0  | 1.2               | -   | -   | 2   | 0.2 | 20              |
| 916           | Stout            | Yes   | Germany     | 3.3  | -                 | -   | -   | 7   | 0.2 | 24              |
| 917           | Baltic Porter    | No    | Belarus     | 6.8  | 0.7               | -   | -   | 1   | -   | 3               |
| 949           | Foreign Stout    | Yes   | Poland      | 6.2  | -                 | -   | -   | -   | 0.3 | -               |
| 973           | Imperial Stout   | Yes   | Netherlands | 7.5  | -                 | -   | -   | -   | -   | -               |
| 976           | Stout            | No    | Belgium     | 7.7  | -                 | -   | -   | -   | -   | -               |
| 977           | Stout            | No    | Belgium     | 6.5  | -                 | -   | -   | 2   | -   | -               |
| 995           | Stout            | Yes   | Scotland    | 6.8  | -                 | 24  | -   | -   | -   | -               |

- = no mycotoxins detected

**S5 Table. Q 6-plex immunoassay screening data strong dark ale beers**

| Sample Number | Designated Style        | Craft | Country       | %ABV | Mycotoxins (µg/L) |     |     |     |     |                 |
|---------------|-------------------------|-------|---------------|------|-------------------|-----|-----|-----|-----|-----------------|
|               |                         |       |               |      | AFB <sub>1</sub>  | DON | ZEN | T-2 | OTA | FB <sub>1</sub> |
| 22            | Double                  | No    | Belgium       | 8.0  | -                 | 13  | -   | -   | 0.3 | -               |
| 25            | Belgian Strong Dark Ale | Yes   | Belgium       | 9.2  | -                 | 15  | -   | -   | 0.3 | -               |
| 26            | Quadrupel               | No    | Belgium       | 11.0 | -                 | 8   | -   | -   | 0.2 | -               |
| 27            | Quadrupel               | No    | Belgium       | 11.0 | -                 | 32  | -   | -   | 0.2 | -               |
| 146           | Quadrupel               | Yes   | Belgium       | 11.3 | -                 | 13  | -   | -   | -   | -               |
| 159           | Abbey Dubbel            | Yes   | Belgium       | 8.0  | -                 | 19  | -   | 3   | 0.2 | 2               |
| 171           | Belgian Strong Dark Ale | Yes   | United States | 10.0 | -                 | 63  | -   | -   | 0.5 | 10              |
| 172           | Quadrupel               | No    | Netherlands   | 10.0 | -                 | 33  | -   | -   | 0.3 | -               |
| 189           | Quadrupel               | No    | Belgium       | 10.0 | -                 | -   | -   | -   | -   | -               |
| 203           | Quadrupel               | Yes   | Belgium       | 10.0 | -                 | -   | -   | -   | 0.2 | 1               |
| 204           | Belgian Strong Ale      | Yes   | Belgium       | 9.0  | -                 | -   | -   | -   | 0.3 | -               |
| 219           | Belgian Strong Ale      | Yes   | Netherlands   | 9.5  | -                 | 73  | 0.6 | -   | 0.3 | 2               |
| 256           | Belgian Strong Dark Ale | Yes   | Belgium       | 9.5  | -                 | -   | -   | 1   | 0.2 | -               |
| 324           | Black & Tan             | Yes   | Netherlands   | 10.0 | -                 | 95  | -   | -   | 0.2 | 12              |
| 331           | Quadrupel               | Yes   | Netherlands   | 10.0 | -                 | 22  | -   | -   | -   | 9               |
| 333           | Belgian Strong Ale      | No    | Belgium       | 11.0 | -                 | 27  | -   | -   | -   | 6               |
| 435           | Belgian Strong Ale      | No    | Belgium       | 10.0 | -                 | -   | -   | 8   | -   | -               |
| 444           | Quadrupel               | Yes   | Belgium       | 10.2 | -                 | 40  | -   | 3   | -   | -               |
| 450           | Belgian Strong Ale      | Yes   | Belgium       | 10.0 | 0.3               | 19  | -   | 5   | -   | 14              |
| 462           | Belgian Strong Ale      | No    | Belgium       | 10.0 | -                 | -   | -   | -   | -   | -               |
| 471           | Quadrupel               | No    | Belgium       | 11.0 | -                 | 37  | -   | 1   | -   | 4               |
| 561           | Belgian Strong Ale      | No    | Belgium       | 9.0  | -                 | 9   | -   | 1   | 0.1 | 5               |
| 568           | Quadrupel               | No    | Belgium       | 11.0 | -                 | 3   | -   | -   | 0.0 | 8               |
| 577           | Weizen Bock             | Yes   | Netherlands   | 9.0  | 1.7               | 23  | -   | 2   | 0.3 | 52              |
| 584           | Quadrupel               | Yes   | USA           | 11.8 | 0.3               | 15  | -   | -   | -   | 35              |
| 586           | Belgian Strong Ale      | Yes   | Netherlands   | 10.0 | 1.3               | 28  | -   | -   | -   | 26              |
| 608           | Belgian Strong Ale      | No    | Belgium       | 9.0  | 2.1               | 46  | -   | 2   | -   | 16              |
| 609           | Belgian Strong Ale      | No    | Belgium       | 9.0  | 2.5               | 52  | 2.6 | 2   | -   | 13              |
| 611           | Belgian Strong Ale      | No    | Belgium       | 9.0  | -                 | 117 | -   | 2   | -   | 9               |
| 620           | Belgian Strong Ale      | Yes   | Belgium       | 10.0 | 0.4               | 58  | -   | -   | 0.1 | 2               |
| 621           | Belgian Strong Ale      | Yes   | Belgium       | 10.0 | -                 | 53  | -   | -   | 0.2 | 1               |
| 633           | Belgian Strong Ale      | Yes   | Belgium       | 10.0 | -                 | 26  | -   | -   | 0.2 | 2               |
| 740           | Quadrupel               | Yes   | Canada        | 10.5 | -                 | 2   | -   | 7   | 0.3 | 1               |
| 744           | Quadrupel               | Yes   | Belgium       | 11.0 | -                 | 3   | -   | 2   | 0.2 | -               |
| 752           | Quadrupel               | Yes   | Belgium       | 12.0 | -                 | 5   | -   | 4   | 0.1 | 2               |
| 784           | Quadrupel               | No    | Belgium       | 10.5 | -                 | 44  | -   | -   | 0.7 | 14              |
| 842           | Belgian Strong Ale      | Yes   | Belgium       | 9.0  | -                 | 15  | -   | -   | 0.6 | -               |
| 873           | Quadrupel               | Yes   | Austria       | 9.7  | -                 | -   | -   | -   | 0.1 | -               |
| 912           | Belgian Strong Dark Ale | Yes   | Nederland     | 9.0  | -                 | -   | 0.7 | -   | -   | 4               |
| 956           | Strong Dark Ale         | No    | Belgium       | 13.0 | -                 | -   | -   | -   | -   | -               |
| 966           | Abbey Dubbel            | Yes   | Belgium       | 8.0  | -                 | -   | -   | -   | 0.2 | -               |

| Sample number | Designated Style | Craft | Country     | %ABV | Mycotoxins (µg/L) |     |     |     |     |                 |
|---------------|------------------|-------|-------------|------|-------------------|-----|-----|-----|-----|-----------------|
|               |                  |       |             |      | AFB <sub>1</sub>  | DON | ZEN | T-2 | OTA | FB <sub>1</sub> |
| 974           | Abbey Dubbel     | Yes   | Netherlands | 8.5  | -                 | -   | -   | -   | 0.2 | -               |
| 983           | Strong Dark Ale  | Yes   | Belgium     | 10.2 | -                 | -   | -   | -   | -   | -               |
| 984           | Quadrupel        | Yes   | Denmark     | 10.0 | -                 | -   | -   | -   | -   | -               |

- = no mycotoxins detected

**S5R Table. R 6-plex immunoassay screening data strong pale ale beers**

| Sample Number | Designated Style         | Craft | Country               | %ABV | Mycotoxins (µg/L) |     |     |     |     |                 |
|---------------|--------------------------|-------|-----------------------|------|-------------------|-----|-----|-----|-----|-----------------|
|               |                          |       |                       |      | AFB <sub>1</sub>  | DON | ZEN | T-2 | OTA | FB <sub>1</sub> |
| 5             | Barley Wine              | Yes   | Denmark               | 10.0 | -                 | 50  | -   | -   | 0.2 | 17              |
| 17            | Barley Wine              | Yes   | Denmark               | 12.0 | -                 | 79  | -   | -   | -   | -               |
| 18            | Barley Wine              | Yes   | Netherlands           | 10.5 | -                 | 25  | -   | -   | -   | -               |
| 28            | Barley Wine              | Yes   | United States         | 11.0 | -                 | 94  | -   | -   | 0.3 | 4               |
| 69            | Belgian Strong Ale       | No    | Belgium               | 9.5  | -                 | -   | -   | -   | 0.2 | -               |
| 84            | Abbey Tripel             | No    | Belgium               | 9.0  | -                 | -   | -   | -   | -   | -               |
| 101           | Belgian Strong Blond Ale | No    | France                | 11.8 | -                 | -   | -   | -   | 0.3 | -               |
| 150           | Barley Wine              | Yes   | United States         | 11.5 | -                 | 76  | -   | -   | -   | 1               |
| 164           | Belgian Strong Dark Ale  | Yes   | Belgium               | 9.0  | -                 | 81  | -   | -   | -   | 10              |
| 165           | Abbey Tripel             | Yes   | Belgium               | 9.5  | -                 | -   | -   | -   | 0.3 | -               |
| 168           | Abbey Tripel             | Yes   | Netherlands           | 9.0  | -                 | 27  | -   | -   | 0.3 | 7               |
| 175           | Barley Wine              | Yes   | United States         | 11.0 | -                 | 58  | -   | -   | 0.3 | 15              |
| 185           | Barley Wine              | Yes   | England               | 11.5 | -                 | 40  | 0.9 | -   | 0.2 | 2               |
| 205           | Strong Pale Ale          | No    | Poland                | 7.0  | -                 | 38  | 0.1 | -   | -   | -               |
| 206           | Belgian Strong Ale       | No    | Germany/United States | 10.0 | -                 | -   | 0.3 | -   | 0.4 | -               |
| 230           | Abbey Tripel             | Yes   | Netherlands           | 9.0  | -                 | 1   | -   | -   | 0.4 | 1               |
| 305           | Abbey Tripel             | No    | Belgium               | 9.0  | -                 | 12  | 0.5 | -   | -   | -               |
| 309           | Barley Wine              | Yes   | Denmark               | 10.4 | -                 | 28  | 1.3 | -   | -   | 10              |
| 311           | Barley Wine              | Yes   | United States         | 9.6  | -                 | 43  | -   | -   | 0.2 | 8               |
| 337           | Barley Wine              | Yes   | Denmark               | 10.5 | -                 | 76  | -   | -   | -   | 10              |
| 339           | Barley Wine              | Yes   | England               | 10.3 | -                 | 26  | -   | -   | 0.3 | 8               |
| 353           | Barley Wine              | Yes   | England               | 11.0 | -                 | -   | -   | 2   | 0.6 | 3               |
| 355           | Barley Wine              | Yes   | Netherlands           | 10.0 | -                 | 37  | -   | -   | -   | 5               |
| 363           | Belgian Ale              | Yes   | Belgium               | 10.0 | -                 | 51  | -   | -   | 0.2 | 6               |
| 368           | Belgian Ale              | Yes   | Denmark               | 9.2  | -                 | 88  | -   | 1   | 0.2 | 11              |
| 382           | Abbey Tripel             | Yes   | Belgium               | 10.0 | -                 | 32  | -   | 3   | 0.3 | 1               |
| 384           | Barley Wine              | Yes   | Netherlands           | 10.3 | -                 | 74  | -   | 1   | 0.4 | 10              |
| 463           | Abbey Tripel             | Yes   | Netherlands           | 9.5  | 0.1               | -   | -   | 9   | 0.1 | 19              |
| 470           | Barley Wine              | Yes   | United States         | 11.0 | -                 | 18  | -   | 2   | -   | 15              |
| 472           | American Strong Ale      | Yes   | Denmark               | 9.3  | 0.3               | 17  | -   | 8   | 0.3 | 39              |
| 478           | Barley Wine              | Yes   | Denmark               | 18.5 | 0.5               | 30  | -   | -   | -   | 9               |
| 480           | Barley Wine              | Yes   | Netherlands           | 9.0  | 0.6               | 16  | -   | -   | -   | 9               |
| 481           | Belgian Strong Ale       | Yes   | Netherlands           | 9.0  | 1.2               | 13  | -   | -   | -   | 16              |
| 508           | Barley Wine              | Yes   | England               | 10.2 | 0.4               | 42  | -   | -   | -   | -               |
| 509           | Abbey Tripel             | Yes   | Netherlands           | 9.5  | 0.6               | 17  | -   | -   | -   | -               |
| 553           | Abbey Tripel             | No    | Belgium               | 7.5  | -                 | -   | 0.1 | 3   | 0.2 | 4               |
| 602           | Belgian Strong Ale       | No    | Belgium               | 12.0 | -                 | -   | -   | 1   | -   | -               |
| 603           | Strong Pale Ale          | No    | Belgium               | 10.0 | -                 | -   | -   | 2   | -   | -               |
| 606           | Strong Pale Ale          | No    | Belgium               | 10.5 | -                 | -   | -   | -   | -   | -               |
| 629           | Abbey Tripel             | Yes   | Denmark               | 9.3  | -                 | 16  | -   | -   | 0.1 | 1               |
| 645           | Barley Wine              | Yes   | USA                   | 13.5 | -                 | 56  | -   | -   | 0.1 | 9               |

| Sample number | Designated Style     | Craft | Country     | %ABV | Mycotoxins (µg/L) |     |     |     |     |                 |
|---------------|----------------------|-------|-------------|------|-------------------|-----|-----|-----|-----|-----------------|
|               |                      |       |             |      | AFB <sub>1</sub>  | DON | ZEN | T-2 | OTA | FB <sub>1</sub> |
| 668           | Abbey Tripel         | No    | Belgium     | 10.0 | -                 | -   | -   | 1   | -   | -               |
| 673           | Belgian Strong Ale   | No    | Belgium     | 9.0  | -                 | 1   | -   | -   | -   | 3               |
| 703           | Barley Wine          | Yes   | USA         | 13.4 | -                 | 28  | -   | -   | 0.2 | 2               |
| 724           | American Strong Ale  | Yes   | USA         | 10.5 | -                 | 16  | -   | 4   | 0.3 | 5               |
| 737           | Barley Wine          | Yes   | Denmark     | 10.0 | -                 | 10  | -   | 2   | 0.1 | 1               |
| 759           | Barley Wine          | Yes   | Netherlands | 15.2 | -                 | -   | -   | -   | 0.2 | -               |
| 760           | Barley Wine          | Yes   | USA         | 13.0 | -                 | 13  | -   | -   | 0.1 | 3               |
| 768           | Barley Wine          | Yes   | Norway      | 10.0 | -                 | 7   | -   | -   | 0.1 | 2               |
| 769           | American Barley Wine | Yes   | USA         | 11.0 | -                 | -   | -   | -   | 0.2 | -               |
| 806           | Strong Pale Ale      | Yes   | Belgium     | 10.0 | 2.6               | -   | -   | -   | -   | 3               |
| 809           | Barley Wine          | Yes   | USA         | 10.2 | -                 | 45  | -   | -   | 0.1 | -               |
| 836           | Belgian, Strong Ale  | No    | France      | 9.0  | -                 | 11  | -   | -   | 0.3 | 1               |
| 840           | Abbey Tripel         | Yes   | Belgium     | 8.5  | -                 | -   | -   | -   | 0.5 | -               |
| 844           | Barley Wine          | Yes   | Denmark     | 11.0 | -                 | 18  | 0.1 | -   | 0.4 | 4               |
| 849           | Barley Wine          | Yes   | USA         | 11.5 | -                 | 10  | -   | -   | 0.6 | 3               |
| 872           | American Strong Ale  | Yes   | USA         | 10.1 | -                 | -   | -   | -   | -   | -               |
| 888           | Abbey Tripel         | Yes   | Netherlands | 7.8  | -                 | -   | -   | -   | -   | -               |
| 898           | Strong Pale Ale      | Yes   | Nederland   | 9.0  | 0.2               | -   | -   | -   | 0.3 | -               |
| 910           | Barley Wine          | Yes   | Nederland   | 10.0 | 2.4               | 2   | -   | -   | -   | -               |
| 915           | Barley Wine          | Yes   | Nederland   | 10.0 | -                 | -   | -   | -   | -   | 5               |
| 920           | American Strong Ale  | Yes   | USA         | 11.6 | -                 | -   | 0.2 | -   | -   | -               |
| 923           | Barley Wine          | Yes   | Nederland   | 12.0 | -                 | 12  | -   | -   | -   | 2               |
| 972           | Strong Pale Ale      | Yes   | Belgium     | 9.5  | -                 | -   | -   | -   | -   | -               |
| 985           | Barley Wine          | Yes   | Netherlands | 15.2 | -                 | 1   | -   | -   | -   | 1               |
| 994           | Barley Wine          | Yes   | France      | 10.5 | -                 | 30  | -   | -   | 0.3 | 3               |
| 1012          | English Barley Wine  | Yes   | Netherlands | 12.0 | -                 | 9   | -   | -   | -   | -               |
| 1042          | Scotch Ale           | Yes   | Scotland    | 8.5  | -                 | 7   | -   | -   | 0.1 | -               |

- = no mycotoxins detected

**S5 Table. S 6-plex immunoassay screening data strong pale lager**

| Number | Designated Style                   | Craft | Country     | %ABV | Mycotoxins (µg/L) |     |     |     |     |                 |
|--------|------------------------------------|-------|-------------|------|-------------------|-----|-----|-----|-----|-----------------|
|        |                                    |       |             |      | AFB <sub>1</sub>  | DON | ZEN | T-2 | OTA | FB <sub>1</sub> |
| 402    | Strong Pale Lager/Imperial Pilsner | No    | Spain       | 6.4  |                   | 2   |     | 2   | 0.3 | 27              |
| 442    | Strong Pale Lager/Imperial Pilsner | No    | Netherlands | 11.6 |                   | 38  |     | 2   |     |                 |
| 460    | Strong Pale Lager/Imperial Pilsner | No    | Austria     | 14.0 | 0.4               | 41  |     |     | 0.2 | 23              |
| 614    | Strong Pale Lager/Imperial Pilsner | No    | Spain       | 6.4  |                   |     |     |     |     | 48              |
| 642    | Strong Pale Lager/Imperial Pilsner | No    | Austria     | 14.0 |                   | 10  |     |     |     | 7               |
| 805    | Strong Pale Lager/Imperial Pilsner | No    | Poland      | 6.2  | 2.9               |     |     |     |     | 11              |
| 808    | Vintage Strong Pale Lager          | No    | Switzerland | 14.0 |                   |     |     |     |     |                 |
| 929    | Strong Pale Lager/Imperial Pilsner | No    | Spain       | 7.2  |                   |     |     |     |     | 1               |

- = no mycotoxins detected



**S5 Table. T 6-plex immunoassay screening data wheat beers**

| Sample Number | Designated Style  | Craft | Country     | %ABV | Mycotoxins (µg/L) |     |     |     |     |                 |
|---------------|-------------------|-------|-------------|------|-------------------|-----|-----|-----|-----|-----------------|
|               |                   |       |             |      | AFB <sub>1</sub>  | DON | ZEN | T-2 | OTA | FB <sub>1</sub> |
| 454           | Dunkel Weizen     | No    | Germany     | 5.0  | -                 | 17  | -   | 7   | -   | 25              |
| 9             | Weizen            | No    | Germany     | 5.5  | -                 | 39  | -   | -   | 0.2 | 7               |
| 15            | Weizen            | No    | Germany     | 5.6  | -                 | 6   | -   | -   | 0.3 | 3               |
| 58            | Weizen            | Yes   | Netherlands | 6.0  | -                 | 19  | -   | -   | -   | -               |
| 74            | Weizen            | No    | Germany     | 5.5  | -                 | -   | -   | -   | -   | 1               |
| 76            | Weizen            | Yes   | Germany     | 5.0  | -                 | -   | -   | -   | 0.3 | 2               |
| 80            | Weizen            | No    | Germany     | 5.4  | -                 | -   | -   | -   | -   | 9               |
| 82            | White beer        | Yes   | Netherlands | 5.5  | -                 | 11  | -   | -   | 0.2 | 2               |
| 92            | Weizen            | No    | Germany     | 5.9  | -                 | 1   | -   | -   | 0.2 | 6               |
| 98            | WeizenBock        | Yes   | Netherlands | 6.4  | -                 | 8   | -   | -   | 0.3 | 12              |
| 100           | Weizen            | No    | Germany     | 5.1  | -                 | -   | -   | -   | 0.2 | 6               |
| 102           | Witbier           | No    | Netherlands | 5.5  | -                 | -   | -   | -   | 0.3 | -               |
| 104           | Witbier           | No    | Netherlands | 5.0  | -                 | -   | -   | -   | -   | -               |
| 113           | Belgian White     | No    | Netherlands | 5.0  | 0.3               | 36  | -   | -   | 0.1 | 19              |
| 141           | Witbier           | No    | Belgium     | 4.9  | -                 | 41  | -   | -   | 0.3 | -               |
| 182           | Dunkel Weizen     | No    | Germany     | 5.2  | -                 | 44  | -   | -   | 0.3 | 20              |
| 202           | Dunkel Weizen     | Yes   | Poland      | 5.0  | -                 | 48  | -   | -   | 0.3 | 2               |
| 207           | Weizen            | Yes   | Poland      | 5.0  | -                 | 9   | -   | -   | 0.4 | 1               |
| 213           | Belgian White     | Yes   | Netherlands | 5.0  | -                 | -   | -   | -   | 0.3 | 2               |
| 228           | Dunkel Weizen     | No    | Germany     | 5.6  | -                 | 3   | -   | -   | 0.8 | 4               |
| 231           | WeizenBock        | No    | Germany     | 8.2  | -                 | 30  | -   | -   | 0.2 | 4               |
| 245           | Weizen            | No    | Germany     | 5.3  | -                 | -   | 0.9 | -   | 0.3 | -               |
| 360           | Wheatbeer         | Yes   | Netherlands | 6.0  | -                 | 1   | -   | -   | 0.3 | 10              |
| 371           | Wheatbeer         | Yes   | Netherlands | 6.0  | -                 | 19  | -   | -   | 0.1 | 2               |
| 400           | Wheat Ale         | No    | Spain       | 5.2  | -                 | -   | -   | -   | 0.3 | 23              |
| 441           | German HefeWeizen | No    | Germany     | 5.6  | -                 | -   | -   | 8   | -   | 30              |
| 448           | Weizen Bock       | Yes   | Germany     | 7.3  | 0.1               | -   | -   | 9   | -   | 55              |
| 458           | Weizen Bock       | No    | Germany     | 7.7  | -                 | 125 | -   | -   | -   | 34              |
| 533           | White beer        | No    | Netherlands | 5.0  | 1.2               | 9   | 0.7 | 8   | 0.2 | 36              |
| 540           | White beer        | No    | Belgium     | 4.9  | -                 | -   | 0.7 | 11  | 0.3 | 23              |
| 550           | White beer        | No    | Netherlands | 5.0  | 0.7               | 26  | -   | 4   | 0.1 | 12              |
| 555           | White beer        | Yes   | Netherlands | 8.0  | -                 | 7   | -   | 2   | 0.2 | 12              |
| 689           | Weizen Bock       | No    | Germany     | 7.3  | -                 | -   | -   | -   | 0.2 | 2               |
| 691           | German HefeWeizen | No    | Germany     | 5.6  | -                 | -   | -   | -   | 0.1 | 1               |
| 713           | German HefeWeizen | Yes   | Netherlands | 5.0  | -                 | -   | -   | 4   | 0.2 | -               |
| 714           | German HefeWeizen | No    | Germany     | 5.6  | -                 | -   | -   | 2   | 0.3 | -               |
| 729           | Weizen            | Yes   | Denmark     | 4.9  | -                 | -   | 0.1 | 6   | 0.1 | -               |
| 783           | Belgian White     | No    | USA         | 5.0  | -                 | 106 | 0.6 | 1   | 0.9 | 14              |
| 804           | German HefeWeizen | No    | Poland      | 5.2  | 3.3               | -   | -   | 2   | -   | 20              |
| 874           | Weizen Bock       | No    | Germany     | 8.2  | -                 | -   | -   | -   | -   | -               |
| 948           | Wheat Ale         | Yes   | Poland      | 5.0  | -                 | -   | -   | -   | 0.3 | -               |

| Sample number | Designated Style | Craft | Country     | %ABV | Mycotoxins (µg/L) |     |     |     |     |                 |
|---------------|------------------|-------|-------------|------|-------------------|-----|-----|-----|-----|-----------------|
|               |                  |       |             |      | AFB <sub>1</sub>  | DON | ZEN | T-2 | OTA | FB <sub>1</sub> |
| 962           | Belgian White    | No    | Netherlands | 5.6  | -                 | -   | -   | -   | -   | -               |

- = no mycotoxins detected
