# Supplementary material for: Mycotoxin profiling of 1000 beer samples with a special focus on craft beer
Source: PubMed Central journal article supplement (PMC5628871; doi:10.1371/journal.pone.0185887), 2017-10-05
Supplement: pone.0185887.s010.pdf [file pone.0185887.s010.pdf]

**S6 Table** Reassessment of two Spanish breweries for FB contaminations in beer ( $\mu\text{g/L}$ ) by LC-MS/MS analysis

| <b>Sample Number</b> | <b>Brewery</b> | <b>Beer</b> | <b>FB<sub>1</sub></b> | <b>FB<sub>2</sub></b> | <b>FB<sub>3</sub></b> | <b>Sum FBs</b> |
|----------------------|----------------|-------------|-----------------------|-----------------------|-----------------------|----------------|
| 936                  | Brewery 1      | beer 1      | 12                    | 3                     | 2                     | 17             |
| 980                  | Brewery 1      | beer 2      | 7                     | 5                     | 2                     | 14             |
| 930                  | Brewery 2      | beer 1      | 26                    | 7                     | 3                     | 37             |
| 934                  | Brewery 2      | beer 2      | 3                     | 3                     | 1                     | 7              |
| 941                  | Brewery 2      | beer 3      | 56                    | 7                     | 5                     | 69             |
| 944                  | Brewery 2      | beer 4      | 22                    | 15                    | 4                     | 41             |
