# Supplementary material for: Mycotoxin profiling of 1000 beer samples with a special focus on craft beer
Source: PubMed Central journal article supplement (PMC5628871; doi:10.1371/journal.pone.0185887), 2017-10-05
Supplement: pone.0185887.s011.pdf [file pone.0185887.s011.pdf]

**S7 Table** DON+D3G contamination per beer style group

| Beer Style Group      | DON+D3G contamination 6-plex immunoassay |               |              | Suspects (from total) | Percentage (%) |
|-----------------------|------------------------------------------|---------------|--------------|-----------------------|----------------|
|                       | Average (µg/L)                           | Median (µg/L) | Range (µg/L) |                       |                |
| Non/low alcohol       | 23                                       | 23            | 11 - 36      | 12 (36)               | 33             |
| Pale Lager            | 23                                       | 19            | 10 - 70      | 22 (166)              | 13             |
| Strong Pale Lager     | 30                                       | 38            | 10 - 41      | 3 (7)                 | 43             |
| Pale Ale              | 38                                       | 30            | 11 - 147     | 27 (94)               | 29             |
| Strong Pale Ale       | 36                                       | 28            | 10 - 139     | 41 (70)               | 59             |
| India Pale Ale        | 47                                       | 26            | 11 - 146     | 15 (43)               | 35             |
| Double India Pale Ale | 45                                       | 52            | 12 - 97      | 9 (40)                | 23             |
| Dark lager            | 49                                       | 45            | 11 - 119     | 19 (28)               | 68             |
| Dark Ale              | 41                                       | 22            | 10 - 121     | 8 (26)                | 31             |
| Strong Dark Ale       | 40                                       | 32            | 13 - 117     | 24 (45)               | 53             |
| Stout                 | 57                                       | 48            | 12 - 267     | 30 (55)               | 54             |
| Imperial Stout        | 86                                       | 79            | 14 - 475     | 105 (126)             | 83             |
| Sour ales             | 30                                       | 21            | 14 - 116     | 6 (82)                | 7              |
| Fruit/Vegetable/Spice | 56                                       | 49            | 12 - 127     | 12 (37)               | 32             |
| Saison                | 19                                       | nd            | nd           | 1 (13)                | 8              |
| Smoked                | 46                                       | 44            | 11 - 219     | 7 (16)                | 44             |
| Wheat                 | 40                                       | 36            | 11 - 125     | 14 (42)               | 33             |
| Bock                  | 33                                       | 28            | 10 - 97      | 20 (38)               | 53             |
| Eisbock               | 81                                       | 27            | 14 - 308     | 5 (6)                 | 83             |
| African Traditional   | 65                                       | 57            | 10 - 141     | 15 (30)               | 50             |
